# Supplementary material
Source: publisher figshare collection journal article supplement (https://acs.figshare.com/ndownloader/files/5808510)
Supplement: Supplementary file 1 [file 5808510]

- 1) Experimental details for the synthesis of starting resins **1a-g**. Experimental details and  $^1\text{H}$  NMR data for the synthesis of *N*-alkyl amino acid trifluoroacetate salts **5a-g** (Table 1).

**Experimental Section. General.** All reagents used are commercially available and were employed without further purification. Fmoc-aminoacid Wang resins (1% divinyl benzene-polystyrene), all aminoacids, and 2,4,5-trichlorophenyl formate were purchased from Novabiochem. All glassware employed in solid-phase reactions had been silanized (treatment with 10% TMSCl/toluene for 12h) and dried. Polypropylene filter vessels were obtained from Bio-Rad. Dried tetrahydrofuran for the reductions was obtained by distillation over sodium/benzophenone ketyl. NMR spectra were recorded on Bruker AM 300, or 200 MHz instruments. Compound purity analysis was carried out by RP-HPLC on a Hewlett-Packard 1100 system using conditions described in the manuscript. Yields of crude cleaved compounds are based on the mass balance based upon the starting loading level of commercial resins.

**Typical synthesis of resin-bound *N*-formyl-amino acids. *N*-formyl-phenylalanine Wang resin (**1d**).** A sample of *N*-Fmoc-phenylalanine Wang resin (1.00 g, 0.40 mmol/g substitution) in a polypropylene vessel was treated with 20% piperidine/DMF (5 mL, 3 min.; then 5 mL, 25 min.). After rinsing with DMF (3 x 5mL), the resin was suspended in dry DMF (5 mL) and 2,4,5- trichlorophenyl formate (0.27 g, 1.2 mmol) was added. The reaction vessel was shaken for 2h at rt, after which time the resin was washed successively with DMF, MeOH, and  $\text{CH}_2\text{Cl}_2$  (3 times each), and dried under high vacuum for >12h to give resin **1d** (0.86 g). A resin sample gave a negative result on a Ninhydrin test.

**Typical synthesis of resin-bound *N*-acyl-amino acids. *N*-Acetyl-valine Wang resin (**1f**).** A sample of *N*-Fmoc-valine Wang resin (1.00 g, 0.64 mmol/g substitution) in a polypropylene vessel was deprotected and rinsed as above. Then, it was suspended in dry DMF (5 mL), then dry  $\text{Et}_3\text{N}$  (0.2 mL) and acetic anhydride (0.5 mL) were added successively. The reaction vessel was shaken for 2h at rt, after which time the resin was washed with DMF, MeOH, and  $\text{CH}_2\text{Cl}_2$  (3 times each), and dried under high vacuum for >12h to give resin **1f** (0.84 g). A resin sample gave a negative result on a Ninhydrin test.

**Typical procedure for Diborane Reduction and Oxidative Work-Up. *N*-Ethylvaline trifluoroacetate salt (**5f**).** A portion of *N*-Acetyl-valine Wang resin (**1f**) (0.200 g, 0.14 mmol, 0.70 mmol/g substitution) was weighed in a 10 mL silanized round bottom flask and swelled in dry THF (1.5 mL) under nitrogen. The diborane solution

(1M/THF, 0.56 mL, 0.56 mmol) was added dropwise at rt over 2 min., after which time the flask was equipped with a condenser and the suspension stirred gently at 65 °C for 12h. Upon cooling to rt, the suspended resin was rapidly transferred by pipet (silanized) to a PP vessel by using dry THF to rinse out the flask and wash the resin. Then, dry THF (2.0 mL), anhydrous diisopropylethylamine (0.4 mL) and glacial acetic acid (0.8 mL) were added successively. To the homogenized suspension was added iodine (70 mg, 0.28 mmol, as a conc. THF solution) and the vessel was shaken for 1h. The vessel was then rinsed (THF) and the resin was washed (3X each) with THF, DMF/Et<sub>3</sub>N 3:1, MeOH, CH<sub>2</sub>Cl<sub>2</sub>, and dried under high vacuum for >12h to give resin **5f** (0.194 g). A resin sample gave a positive result on a bromophenol blue test.

The bulk of resin **5f** (0.188 g, ~0.70 mmol/g) was then transferred to a small round bottom flask and stirred in a 90% TFA/CH<sub>2</sub>Cl<sub>2</sub> cocktail (2 mL) for 2h. The contents were filtered through a glasswool plug, the resin was rinsed with TFA, and the filtrate evaporated and dried over high vacuum for >12h to give crude trifluoroacetate salt **5f** as a white powder (23 mg, 69%). Its purity was estimated to >95% by <sup>1</sup>H NMR and RP-HPLC.

**<sup>1</sup>H NMR data for all *N*-alkyl amino acid trifluoroacetate salts 5a-g (Table 1):**

***N*-Me-Ala (5a).** <sup>1</sup>H NMR (300 MHz, CD<sub>3</sub>OD) δ 3.92 (q, *J* = 7.5 Hz, 1H), 2.70 (s, 3H), 1.54 (d, *J* = 7.5 Hz).

***N*-Me-Val (5b).** <sup>1</sup>H NMR (300 MHz, CD<sub>3</sub>OD) δ 3.77 (d, *J* = 6.0 Hz, 1H), 2.73 (s, 3H), 2.30 (m, 1H), 1.13 (d, *J* = 7.0 Hz, 3H), 1.05 (d, *J* = 7.0 Hz, 3H).

***N*-Me-Ser (5c).** <sup>1</sup>H NMR (300 MHz, CD<sub>3</sub>OD) δ 4.01 (d, *J* = 6.0 Hz, 2H), 3.86 (t, *J* = 6.0 Hz, 1H), 2.73 (s, 3H).

***N*-Me-Phe (5d).** <sup>1</sup>H NMR (300 MHz, CD<sub>3</sub>OD) δ 7.4-7.2 (m, 5H), 4.23 (t, *J* = 6.0 Hz, 1H), 3.3 (m, 2H), 2.70 (s, 3H).

***N*-Et-Phe (5e).** <sup>1</sup>H NMR (300 MHz, CD<sub>3</sub>OD) δ 7.4-7.2 (m, 5H), 4.23 (t, *J* = 6.0 Hz, 1H), 3.4-3.1 (m, 2H), 3.09 (q, *J* = 7.0 Hz, 2H), 1.29 (t, *J* = 7.0 Hz, 3H).

***N*-Et-Val (5f).** <sup>1</sup>H NMR (300 MHz, CD<sub>3</sub>OD) δ 3.76 (d, *J* = 6.0 Hz, 1H), 3.09 (q, *J* = 6.0 Hz, 2H), 2.28 (m, 1H), 1.32 (t, *J* = 6.0 Hz, 3H), 1.14 (d, *J* = 7.0 Hz, 3H), 1.05 (d, *J* = 7.0 Hz, 3H).

***N*-Pr-Val (5g).** <sup>1</sup>H NMR (300 MHz, CD<sub>3</sub>OD) δ 3.78 (d, *J* = 6.0 Hz, 1H), 2.97 (m, 2H), 2.30 (m, 1H), 1.75 (m, 2H), 1.15 (d, *J* = 7.0 Hz, 3H), 1.05 (d, *J* = 7.0 Hz, 3H), 1.00 (t, *J* = 6.5 Hz, 3H).

**2) <sup>1</sup>H NMR spectra of crude *N*-alkyl amino acid trifluoroacetate salts 5a-g (Table 1).**

Following pages

<sup>1</sup>H NMR (CD<sub>3</sub>OD)

5a (crude)

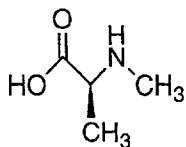• CF<sub>3</sub>CO<sub>2</sub>H

D. HALL, OHH-III-42 IN C0300

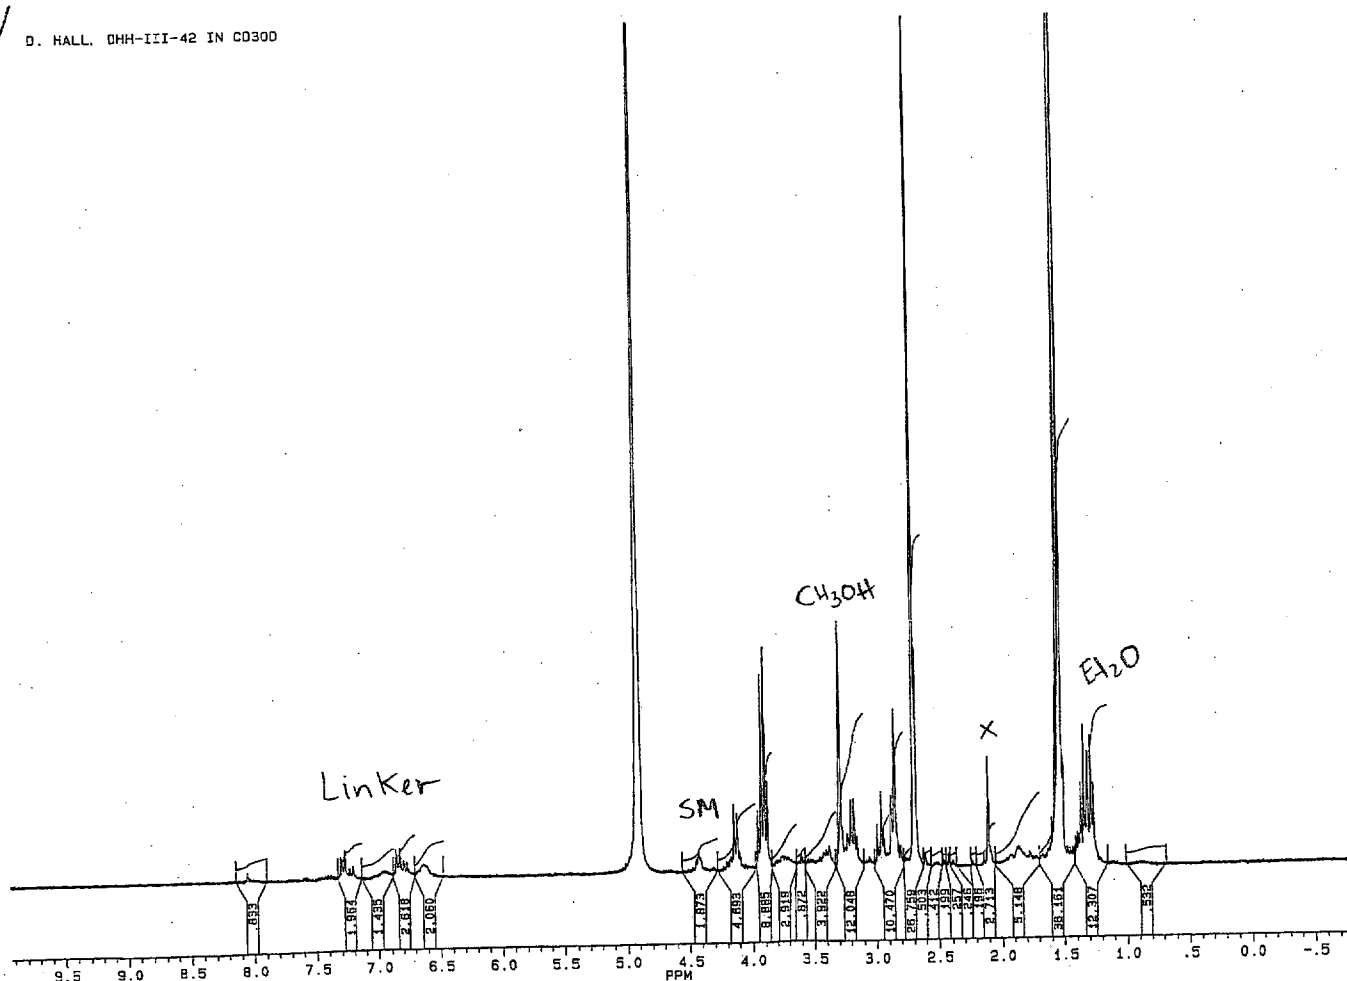

BRUKER

SE04318H.001  
DATE 4-9-98  
TIME 16:10SF 300.135  
SY 100.0500000  
Q1 6300.000  
SI 32768  
TD 32768  
SW 4504.505  
HZ/PT .275PW 3.0  
RO 0.0  
AQ 3.637  
RG 320  
NS 200  
TE 297FW 5700  
Q2 140000.000  
DP 12L POLS 0.0  
GB 0.0  
CX 36.00  
CY 0.0  
F1 10.000P  
F2 -.800P  
HZ/CM 90.041  
PPM/CM .300  
SR 4551.57

**5b** (crude)

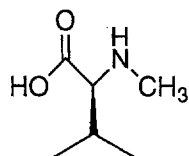 $\cdot \text{CF}_3\text{CO}_2\text{H}$ 

DENNIS HALL H-1 ON DHH-III-80 IN C030D

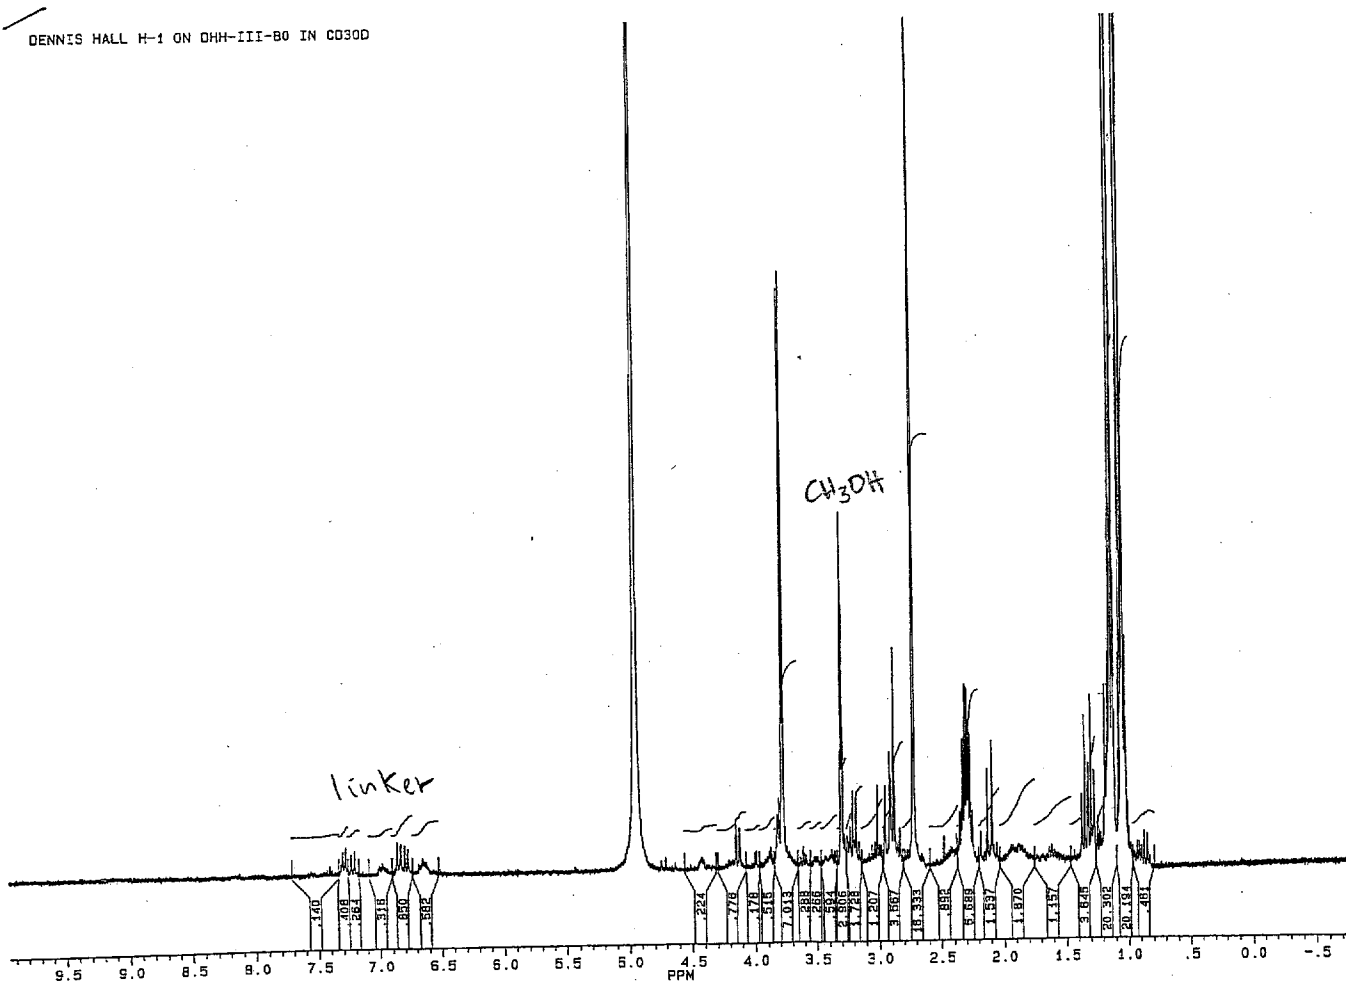

BRUKER

|       |             |
|-------|-------------|
| SF    | 300.135     |
| SY    | 100.0500000 |
| Q1    | 6300.000    |
| SI    | 32768.      |
| TD    | 32768       |
| SW    | 4504.505    |
| HZ/PT | .275        |

|    |       |
|----|-------|
| PW | 3.0   |
| RD | 0.0   |
| AQ | 3.637 |
| RG | 200   |
| NS | 32    |
| TE | 297   |

```
FW      5700
D2 140000.000
DP 12L PD
```

|        |         |
|--------|---------|
| LB     | 0.0     |
| GB     | 0.0     |
| CX     | 35.00   |
| CY     | 0.0     |
| F1     | 10.000P |
| F2     | - .800P |
| HZ/CM  | 90.041  |
| PPM/CM | .300    |
| SR     | 4551.57 |

CN(C)C(O)C(=O)O

BRUKEF

|       |             |
|-------|-------------|
| SF    | 300.135     |
| SY    | 100.0500000 |
| O1    | 6300.000    |
| SI    | 32768       |
| TD    | 32768       |
| SW    | 4504.505    |
| HZ/PT | .275        |

|    |       |
|----|-------|
| PW | 3.0   |
| RD | 0.0   |
| AQ | 3.637 |
| RG | 400   |
| NS | 88    |
| TE | 297   |

```
FW      5700
02 140000.000
DP      12L PD
```

|        |         |
|--------|---------|
| LB     | 0.0     |
| GB     | 0.0     |
| CX     | 36.00   |
| CY     | 0.0     |
| F1     | 10.000P |
| F2     | - .800P |
| HZ/CM  | 90.041  |
| PPM/CM | .300    |
| SR     | 4551.57 |

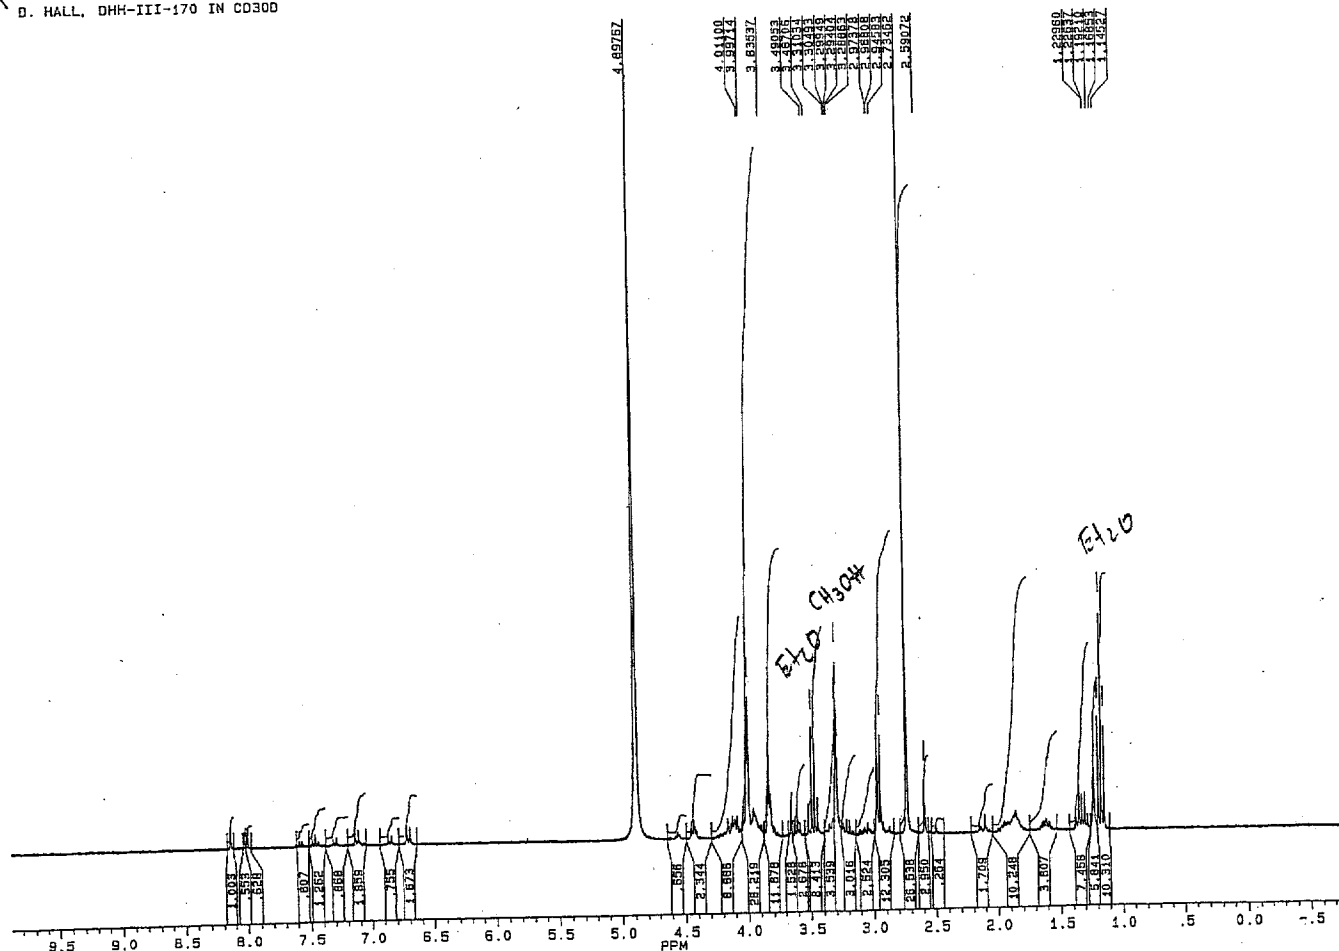

<sup>1</sup>H NMR (CD<sub>3</sub>OD)

5d (crude)

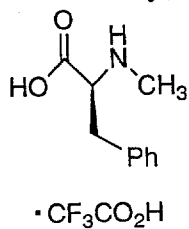

DENNIS HALL H-1 ON OHM-III-26 IN CD300

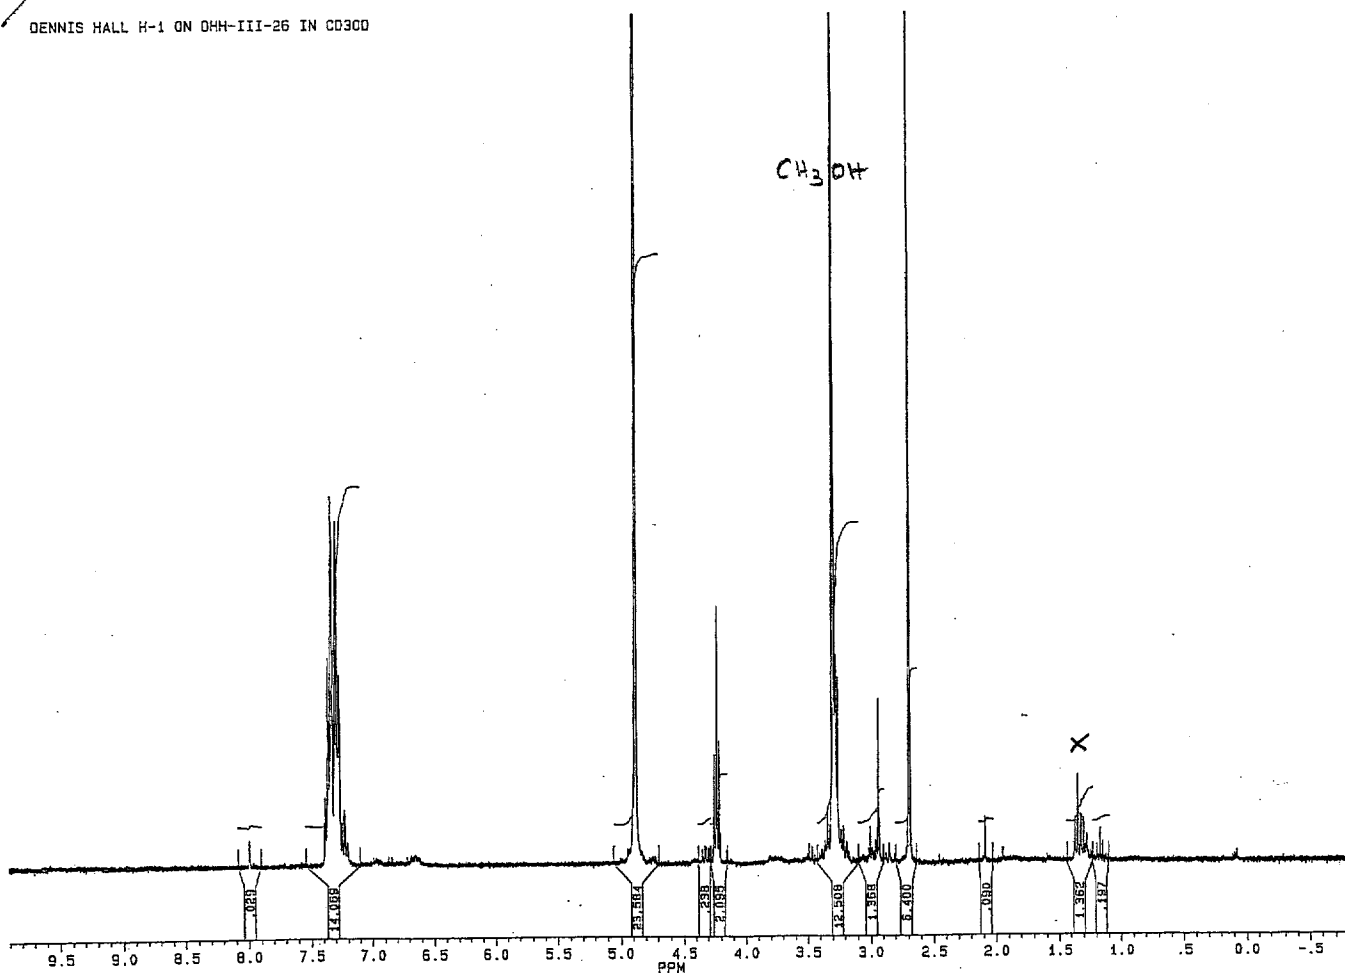

BRUKER

AU26315H.001  
DATE 3-10-98  
TIME 15: 41SF 300.135  
SY 100.9500000  
Q1 6500.000  
SI 32768  
TD 32768  
SW 4504.505  
HZ/PT .275PW 3.0  
RD 0.0  
AQ 3.637  
RG 800  
NS 160  
TE 297FW 5700  
Q2 140000.000  
OP 12L P0LB 0.0  
SB 0.0  
CX 36.00  
CY 0.0  
F1 10.000P  
F2 -1.800P  
HZ/CM 90.041  
PPM/CM .300  
SR 4551.57

<sup>1</sup>H NMR (CD<sub>3</sub>OD)

5e (crude)

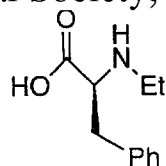• CF<sub>3</sub>CO<sub>2</sub>H

DENNIS HALL PROTON ON SAMPLE DMH-III-52

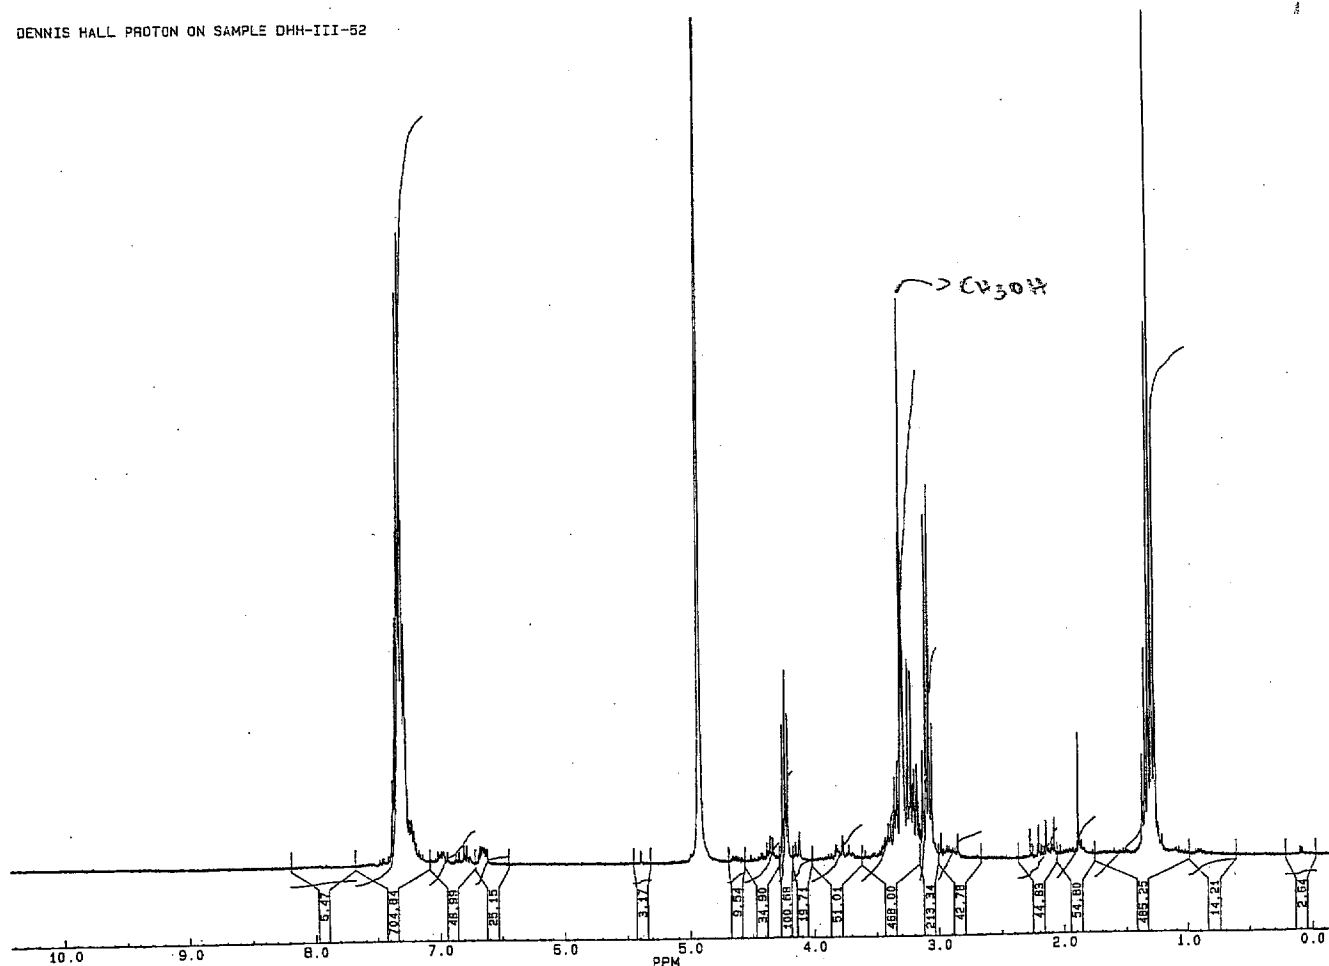

SE10310H  
DATE 10-9-98  
TIME 14:54

SF 300.135  
SY 100.0  
Q1 5370.000  
S1 32768  
TD 32768  
SW 6024.095  
HZ/PT .368

PW 3.0  
RD 0.0  
AQ 2.720  
RG 400  
NS 112  
TE 297

FW 7600  
Q2 3200.000  
DP 63L F0

LB 0.0  
GB .010  
CX 36.00  
CY 0.0  
F1 10.600P  
F2 -1.200P  
HZ/CM 90.941  
PPM/CM .300  
SR 4551.54

$^1\text{H}$  NMR ( $\text{CD}_3\text{OD}$ )

5f (crude)

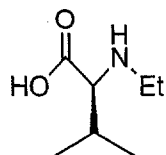 $\cdot \text{CF}_3\text{CO}_2\text{H}$ D. HALL H-1 ON DHH-III-112 IN  $\text{CD}_3\text{OD}$ 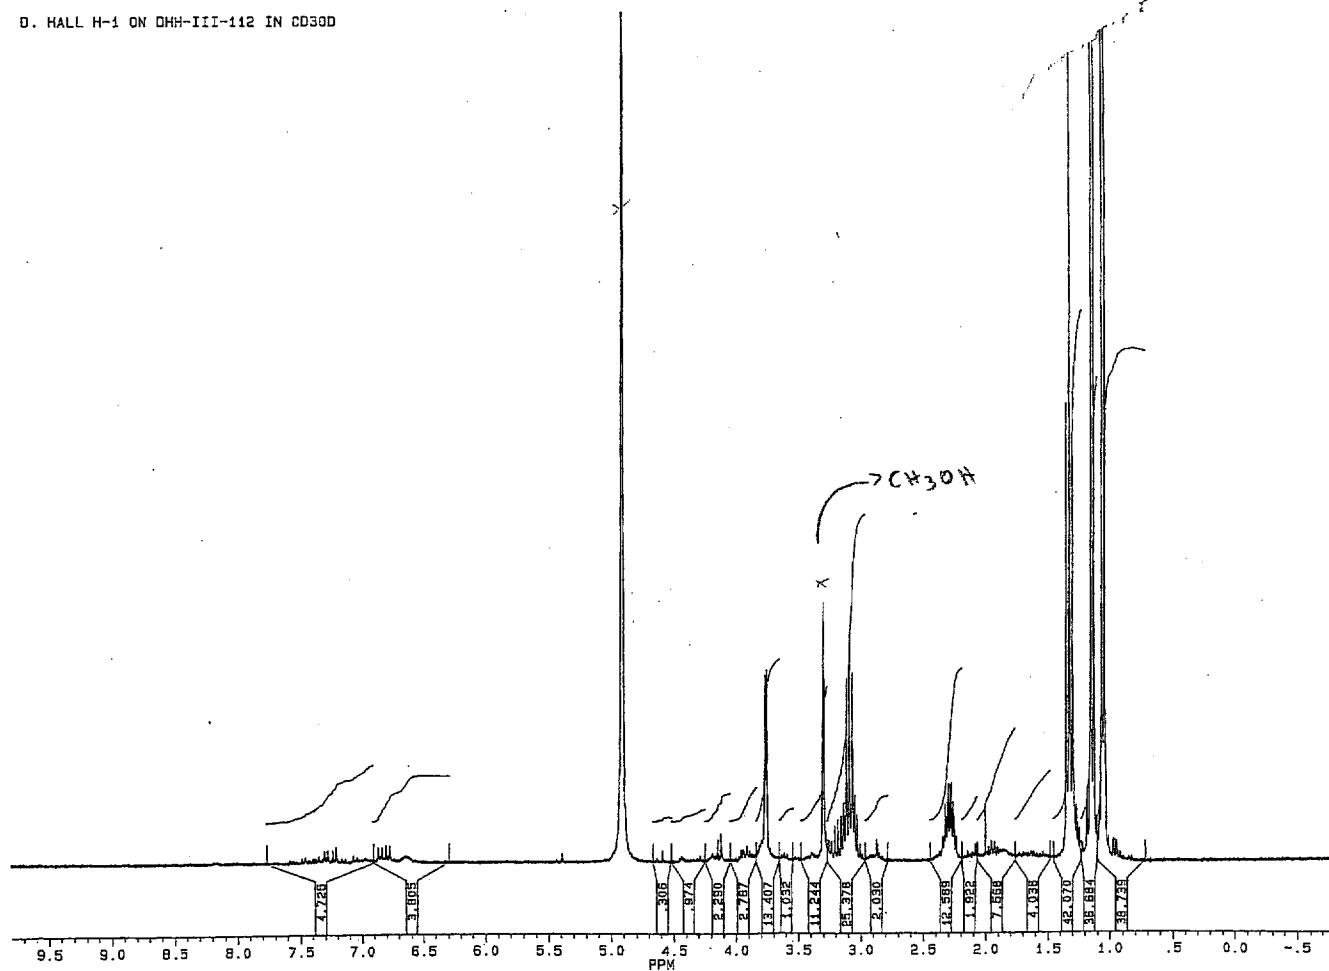

BRUKER

0C05310H.001  
DATE 5-12-98  
TIME 11:36SF 300.135  
SY 100.050000  
Q1 5300.000  
SI 32768  
TD 32768  
SN 4504.505  
HZ/PT .275PW 3.0  
RD 0.0  
AQ 3.637  
RG 320  
NS 64  
TE 297FW 5700  
Q2 140000.000  
DP 12L P0LB 0.0  
GB 0.0  
CX 36.00  
CY 0.0  
F1 10.000P  
F2 -.800P  
HZ/CM 90.041  
PPM/CM .300  
SR 4551.57



<sup>1</sup>H NMR (CD<sub>3</sub>OD)

5g (crude)

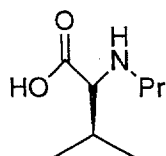• CF<sub>3</sub>CO<sub>2</sub>H

D. HALL, DHH-III-96 IN CD3OD

PPM

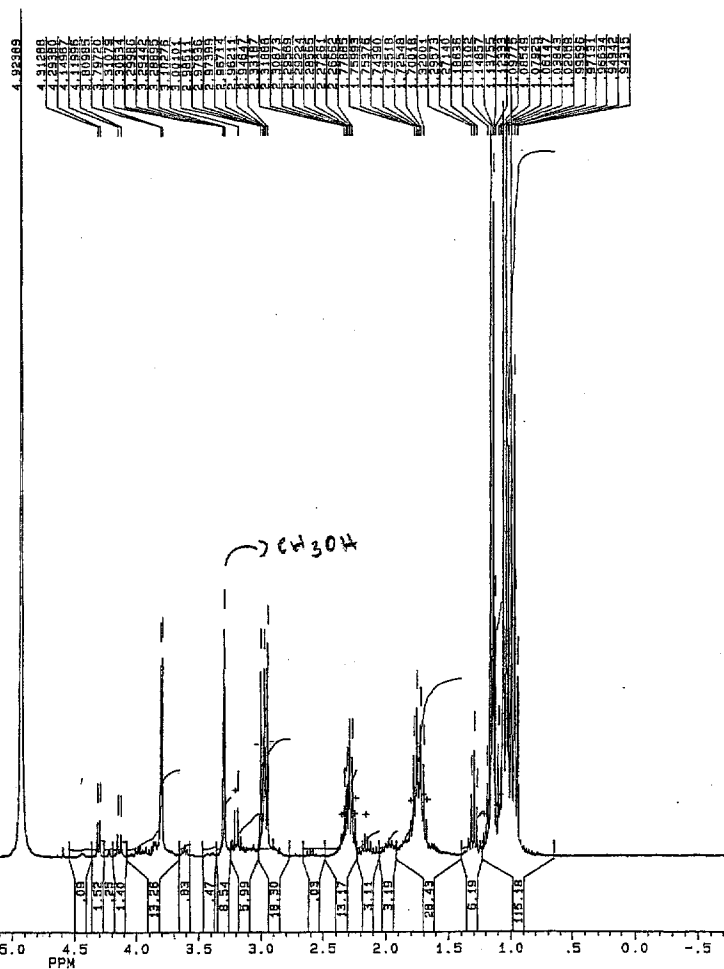

BLANKER

SE30307H.101  
DATE 9-11-98  
TIME 13:04SF 300.135  
SY 100.0500000  
Q1 6300.000  
SI 32768  
TD 32768  
SW 4504.505  
HZ/PT .275PW 3.0  
RO 0.0  
AQ 3.657  
RG 160  
NS 120  
TE 297FW 5700  
O2 140000.000  
DP 12L P0LB 0.0  
GB 0.0  
CX 35.00  
CY 0.0  
F1 10.00  
F2 0.00  
HZ/CM 90.00  
PPM/CM 300  
SR 4551.57

3) Experimental details for the formation of synthetic Fmoc-MePhe-OH, its  $^1\text{H}$  NMR spectra, and optical rotation measurement compared with an authentic sample.

**Synthetic *N*-Fmoc-*N*-Methylphenylalanine.** A sample of freshly prepared resin **4d** (0.170 g, 0.075 mmol, 0.44 mmol/g substitution) in a PP vessel was suspended in dry  $\text{CH}_2\text{Cl}_2$  (2 mL). Diisopropylethylamine (0.075 mL, 0.45 mmol) and FmocCl (75 mg, 0.30 mmol) were added successively and the vessel was shaken 6h at rt. The resin was then washed (3X each) with  $\text{CH}_2\text{Cl}_2$ , DMF,  $\text{CH}_2\text{Cl}_2$ , and dried under high vacuum for >12h. A resin sample gave a negative result on a bromophenol blue test.

The bulk of the resin (0.175 g) was then cleaved as above for compound **5f**. The crude synthetic sample of Fmoc-MePhe-OH was obtained as a white powder (27 mg, 88%). Although of good purity by  $^1\text{H}$  NMR, it was further purified by preparative TLC on silica gel (0.5 mm, eluant: 5% MeOH/  $\text{CH}_2\text{Cl}_2$ ). The final purity was estimated to >95% by  $^1\text{H}$  NMR and RP-HPLC.

**Optical rotation measurements (Perkin-Elmer 241 polarimeter, 589 nm, cell length 1 dm, at 25 °C):**

Synthetic Fmoc-MePhe-OH: 13.0 mg in 1.0 mL MeOH =  $-0.708^\circ$ ,  $[\alpha]_D = -56^\circ$

Fmoc-MePhe-OH (Novabiochem): 15.0 mg in 1.0 mL MeOH =  $-0.899^\circ$ ,  $[\alpha]_D = -60^\circ$

<sup>1</sup>H NMR (CD<sub>3</sub>OD)

Synthetic (crude)

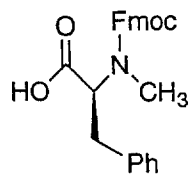

DENNIS HALL, DHH-III-38 IN CD3OD

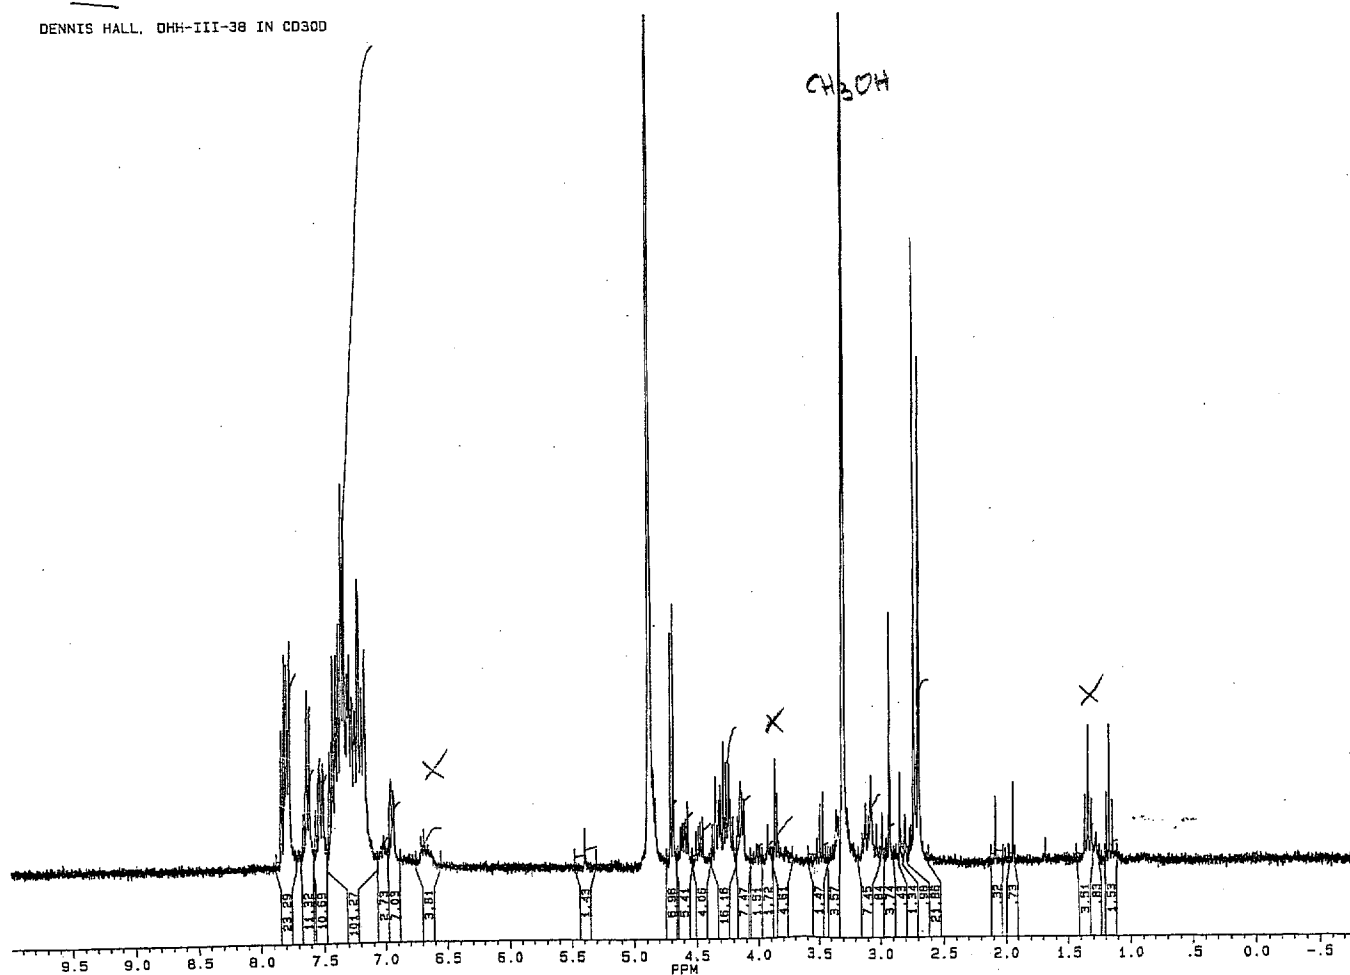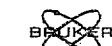
 SE04313H.001  
 DATE 4-9-98  
 TIME 14:26

 SF 300.135  
 SY 100.0500000  
 C1 6300.000  
 SI 32768  
 TD 32768  
 SW 4504.505  
 HZ/PT .275

 PW 3.0  
 RD 0.0  
 AQ 3.637  
 RG 800  
 NS 122  
 TE 297

 FW 5700  
 C2 140000.000  
 DP 12L PC

 LB 0.0  
 GB 0.0  
 CX 36.00  
 CY 0.0  
 F1 10.000P  
 F2 -.800P  
 HZ/CM 90.041  
 PPM/CM .300  
 SR 4551.29

$^1\text{H}$  NMR ( $\text{CD}_3\text{OD}$ )Commercial  
sample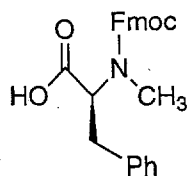

D. HALL, STANDARD IN CD300

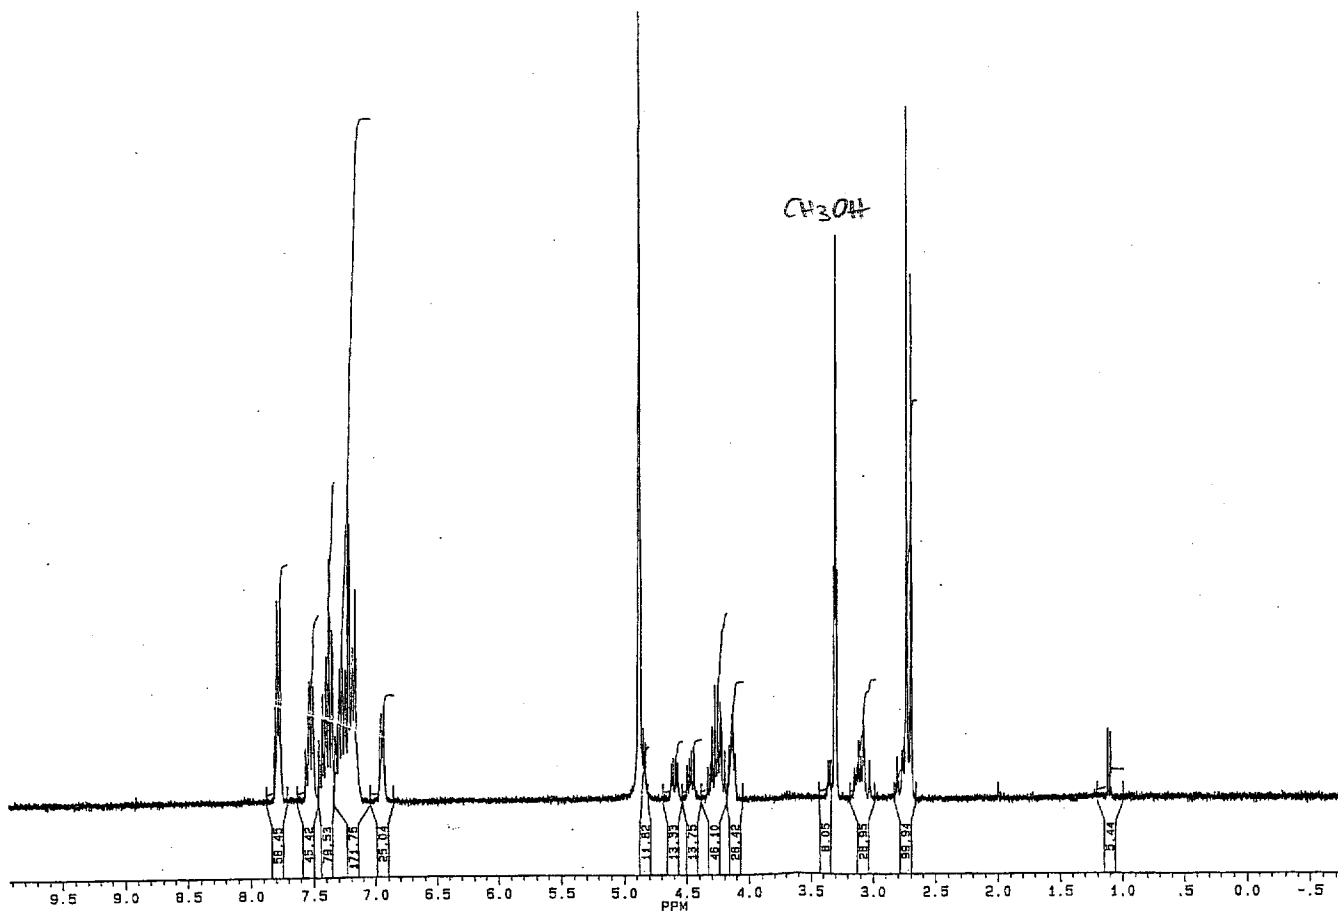

BRUKER

JN17302H.001  
DATE 7-7-98  
TIME 11:25SF 300.135  
SY 100.050000  
OI 6300.000  
SI 32768  
TO 32768  
SW 4504.505  
HZ/PT .275PW 3.0  
RO 0.0  
AQ 3.637  
RG 640  
NS 32  
TE 297FW 5700  
O2 140000.000  
OP 12L PDLB 0.0  
GB 0.0  
CX 36.00  
CY 0.0  
F1 10.000P  
F2 1.000P  
HZ/CM 50.041  
PPM/CM .300  
SR 4551.57

4) Experimental details and selected NMR spectral data ( $^1\text{H}$ ,  $^{13}\text{C}$ ) for *N*-alkyl amino acid esters **4h-j** and their precursors (Table 2).

***N*-Acyl amino acid esters.** These *N*-formyl and *N*-acetyl precursors were synthesized by means similar to the solid-phase examples described above.

**Typical procedure for Diborane Reduction and Oxidative Work-Up. *N*-Methylphenylalanine *t*-butyl ester (**4h**).** The diborane solution (1M/THF, 8.9 mL, 8.9 mmols) was added at 0 °C to a solution of **1h** (0.97 g, 3.9 mmols) in dry THF (6.7 mL). The solution was stirred at reflux temperature for 4h. Upon cooling to rt, triethylamine (2 mL), glacial acetic acid (3 mL) and iodine (1.09 g, 4.3 mmols, in THF) were added successively. The mixture was stirred for 2h then transferred slowly to an extraction funnel containing conc. aqueous NaOH and aq. saturated  $\text{Na}_2\text{S}_2\text{O}_3$  (10 mL). The pH was adjusted to >11 with NaOH pellets, and the solution is extracted with ether (4x). The combined organic layers were washed with brine (10 mL), dried with anhydrous  $\text{MgSO}_4$ , filtered and concentrated. The brown oil was then dried under high vacuum for 4h, affording crude compound **4h** (0.77 g, 84%). It was found of satisfying purity (>90%) according to  $^1\text{H}$  and  $^{13}\text{C}$  NMR analysis. Highly pure analytical samples can be obtained by flash-chromatography purification using 1-5%  $\text{MeOH}/\text{CH}_2\text{Cl}_2$ .

Selected  $^1\text{H}$  and  $^{13}\text{C}$  NMR spectra of compounds **4h-j** are included in the following pages.

$^1\text{H}$  NMR ( $\text{CDCl}_3$ )

**4a** (crude)

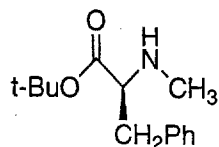

300 MHz 1D in  $\text{CDCl}_3$  (ref. to  $\text{CDCl}_3$  @ 7.24 ppm), temp 27.5 C  $\rightarrow$  actual temp = 27.0 C

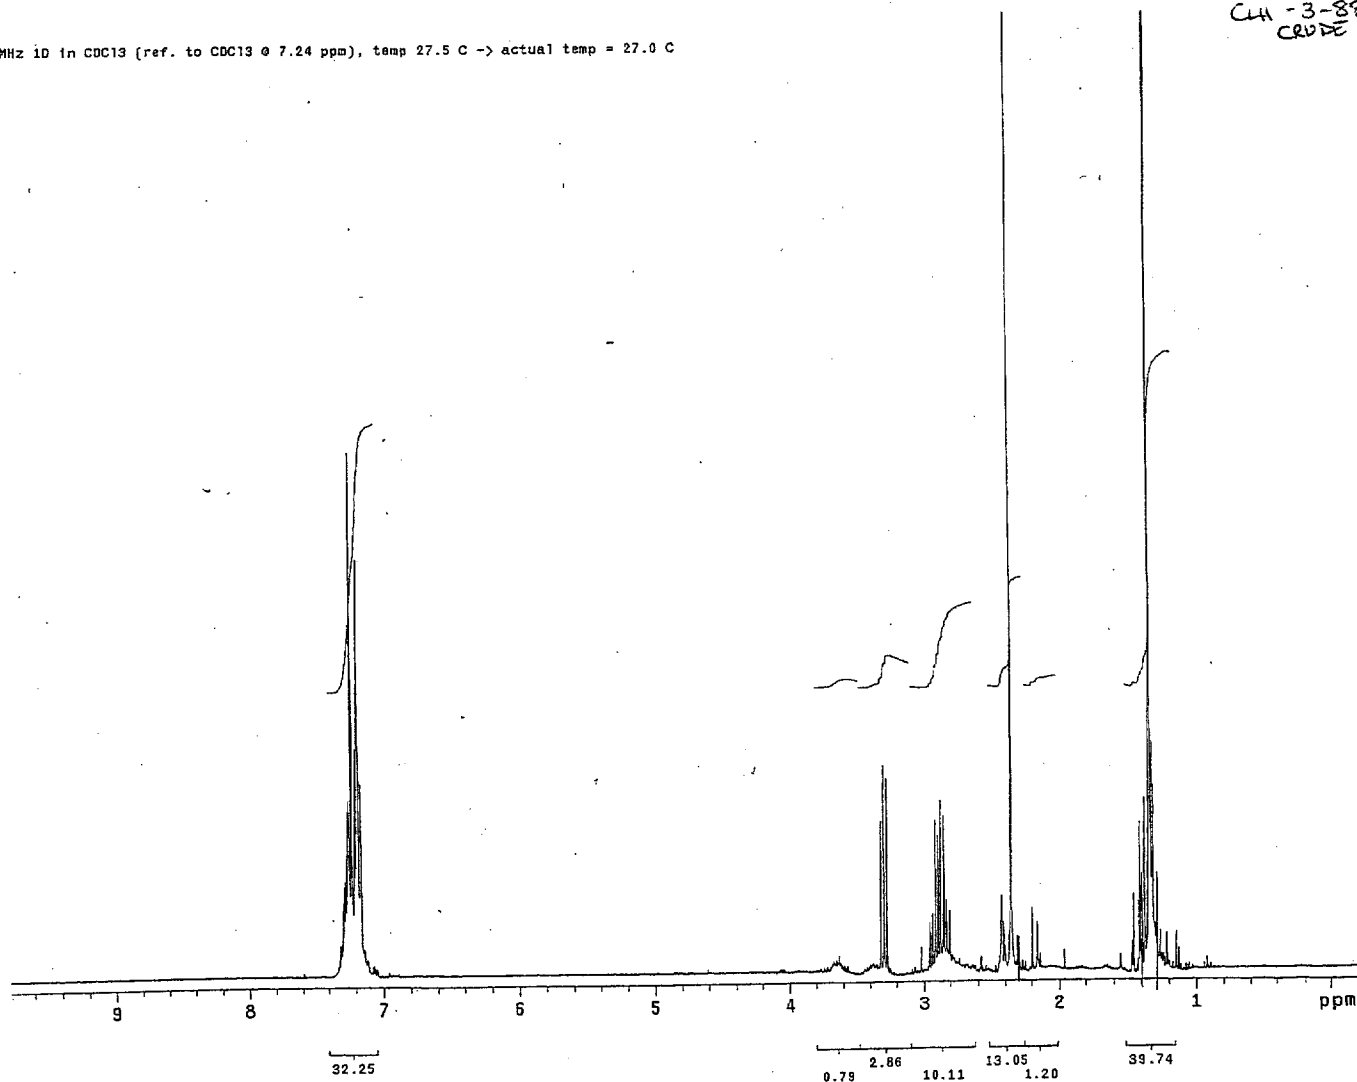

$^{13}\text{C}$  NMR ( $\text{CDCl}_3$ )

4a (crude)

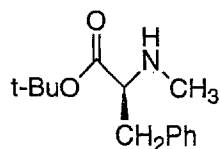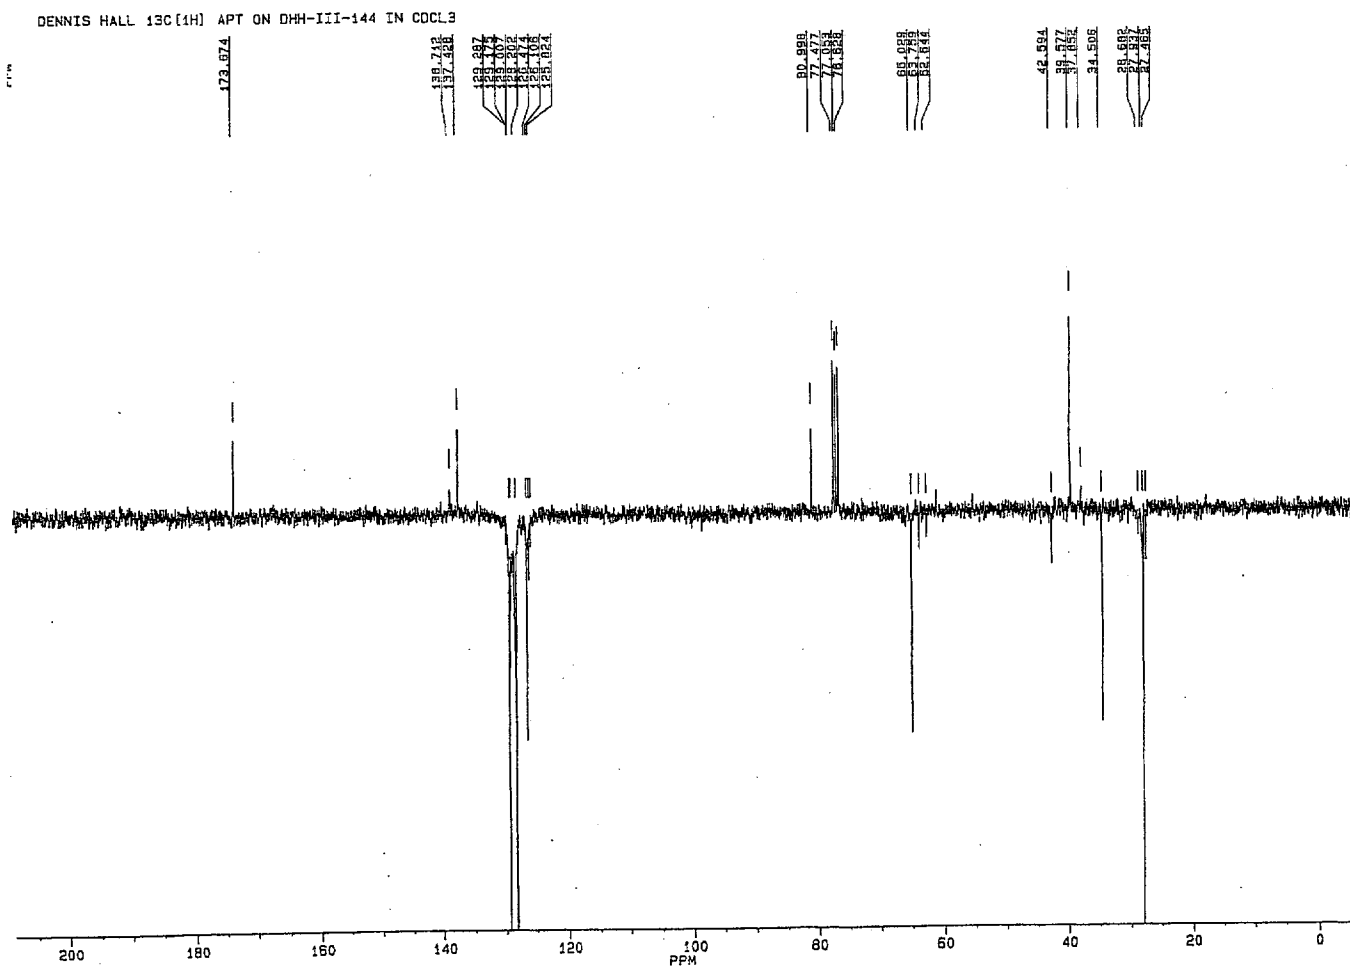

BRUKER

OC23318C.001  
AU PROG:  
CAPT3.AU  
DATE 23-10-98  
TIME 15:45

SF 75.469  
SY 112.0  
O1 7600.000  
SI 32768  
TD 32768  
SW 20000.000  
HZ/PT 1.221

PW 0.0  
RD 0.0  
AG 0.819  
RG 800  
NS 560  
TE 297

FW 25000  
Q2 4700.000  
DP 18H CPD

LB 2.000  
GB 0.0  
CX 36.00  
CY 0.0  
F1 210.002P  
F2 -5.999P  
HZ/CN 452.813  
PPM/CN 6.000  
SR -1400.42

D2 0.010000  
S2 18H  
O1 2.0000000  
PS 100.00  
SI 0H  
P3 2.00  
D5 0.0040000  
P1 9.00  
D6 0.0020000  
P2 18.00  
P6 8.60  
RD 0.0  
PW 0.0  
DE 33.80  
NS 560  
DS 2

**4b** (crude)

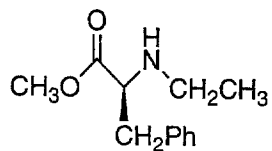

DR. HALL H-1 ON DHH-III-156-A IN CDCL3

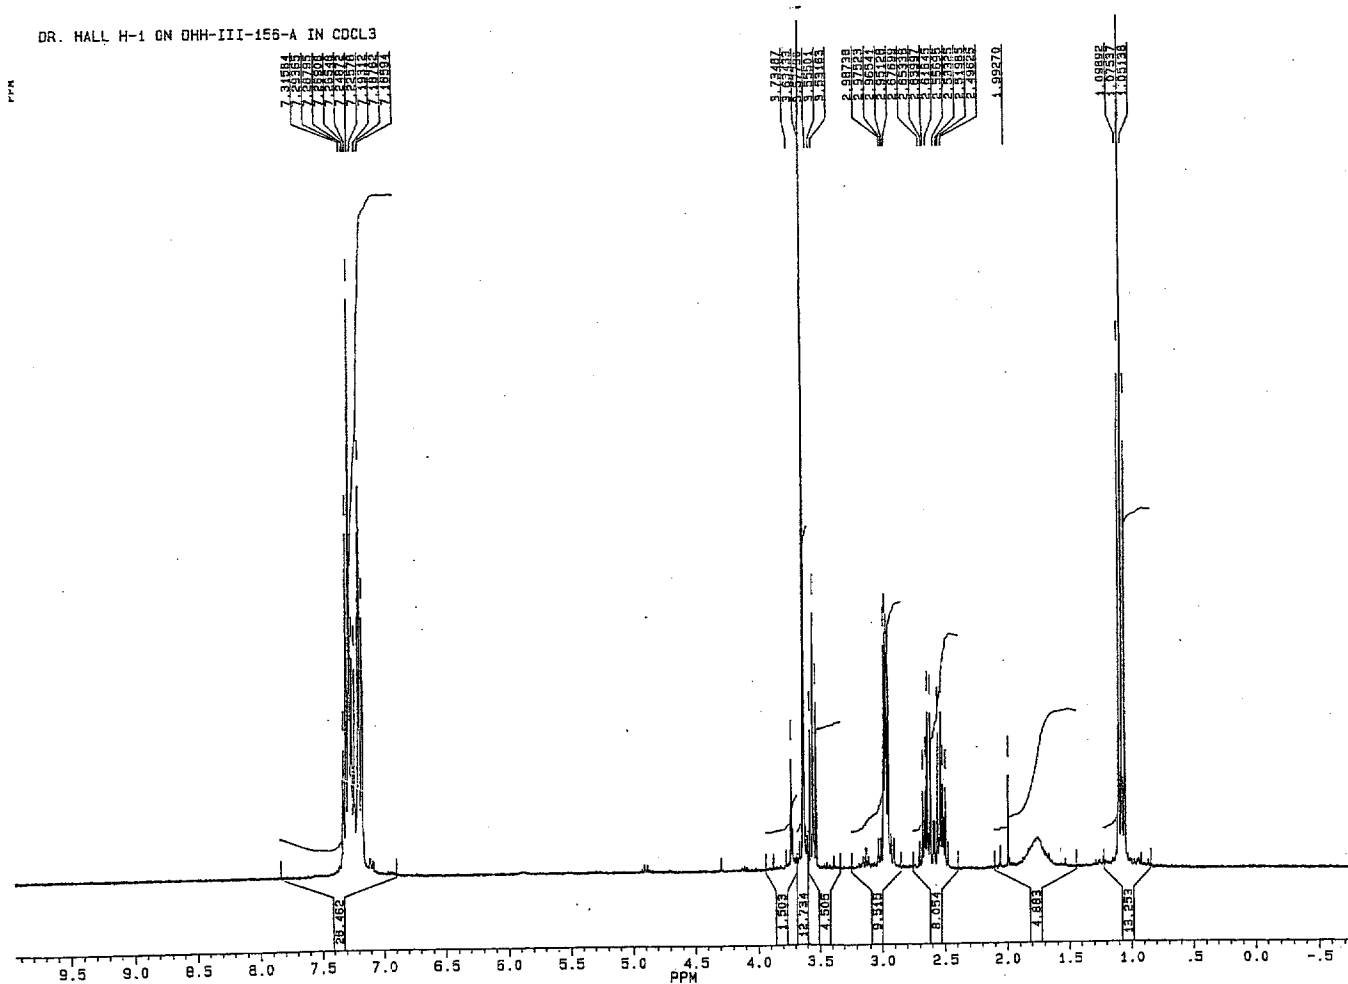

~~BRUKER~~

QC250F.102  
AU PROG:  
X00 AU  
DATE 30-10-96  
TIME 14: 27

SF 300.133  
SY 100.0  
D1 5200.000  
S1 3278.5  
S2 3278.6  
TD  
FW 6024.096  
HZ/FT .366

PM 0.0  
RD 0.0  
AQ 2.720  
RG 640  
NS 160  
TE 297

FW 760.0  
Q2 0.0  
Q3 63L P0  
LB 0.0  
CX 0.0  
C3 36.00  
CY 0.0  
F1 40.00  
F2 -.799  
HZ/CM 90.03  
PPM/CM .300  
SR 3366.10

D1 .20000  
P0 2.50  
RD 0.0  
FW 0.0  
DE 105.80  
NS 160  
DS 2



$^{13}\text{C}$  NMR ( $\text{CDCl}_3$ )

4b (crude)

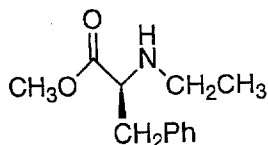D. HALL  $^{13}\text{C}\{^1\text{H}\}$  APT ON DHH-III-156-A IN  $\text{CDCl}_3$ 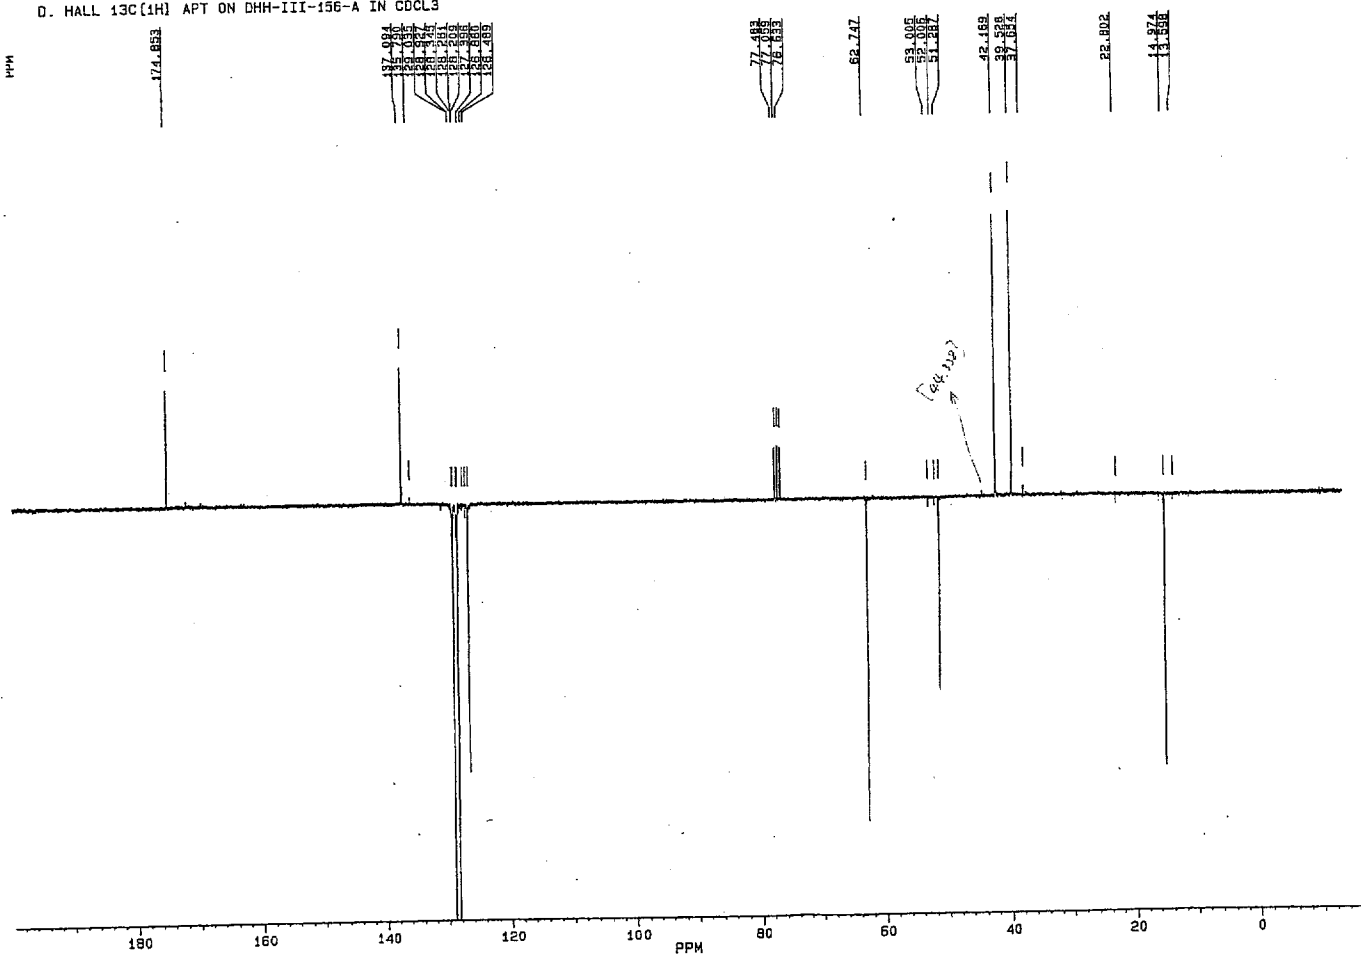

BLANKER

NV02305C.001  
AU PROG.  
CAPT3.AU  
DATE 2-11-98  
TIME 12:24

SF 75.469  
SY 112.0  
O1 7600.000  
S1 65536  
TD 32768  
SW 20000.000  
HZ/PT .610

PW 0.0  
RD 0.0  
AQ .819  
RG 800  
NS 805  
TE 297

FW 25000  
C2 5000.000  
DP 16H CPD

LB 1.000  
GB 0.0  
CX 36.00  
CY 0.0  
F1 200.008P  
F2 -15.995P  
HZ/CM 452.813  
PPM/CM 6.000  
SR -1393.10

D2 .0010000  
S2 16H  
D1 2.0000000  
P9 100.00  
S4 0H  
P3 2.00  
D5 .0040000  
P1 9.00  
D6 .0020000  
P2 48.00  
P6 8.60  
RD 0.0  
PW 0.0  
DE 33.80  
NS 805  
DS 2

$^1\text{H}$  NMR ( $\text{CDCl}_3$ )

**4c** (crude)

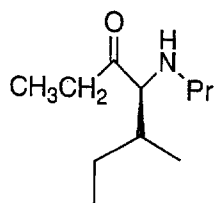

300 MHz 1D in  $\text{CDCl}_3$  (ref. to  $\text{CDCl}_3$  @ 7.24 ppm), temp 27.5 C  $\rightarrow$  actual temp = 27.0 C

CH-3-117 crude dry

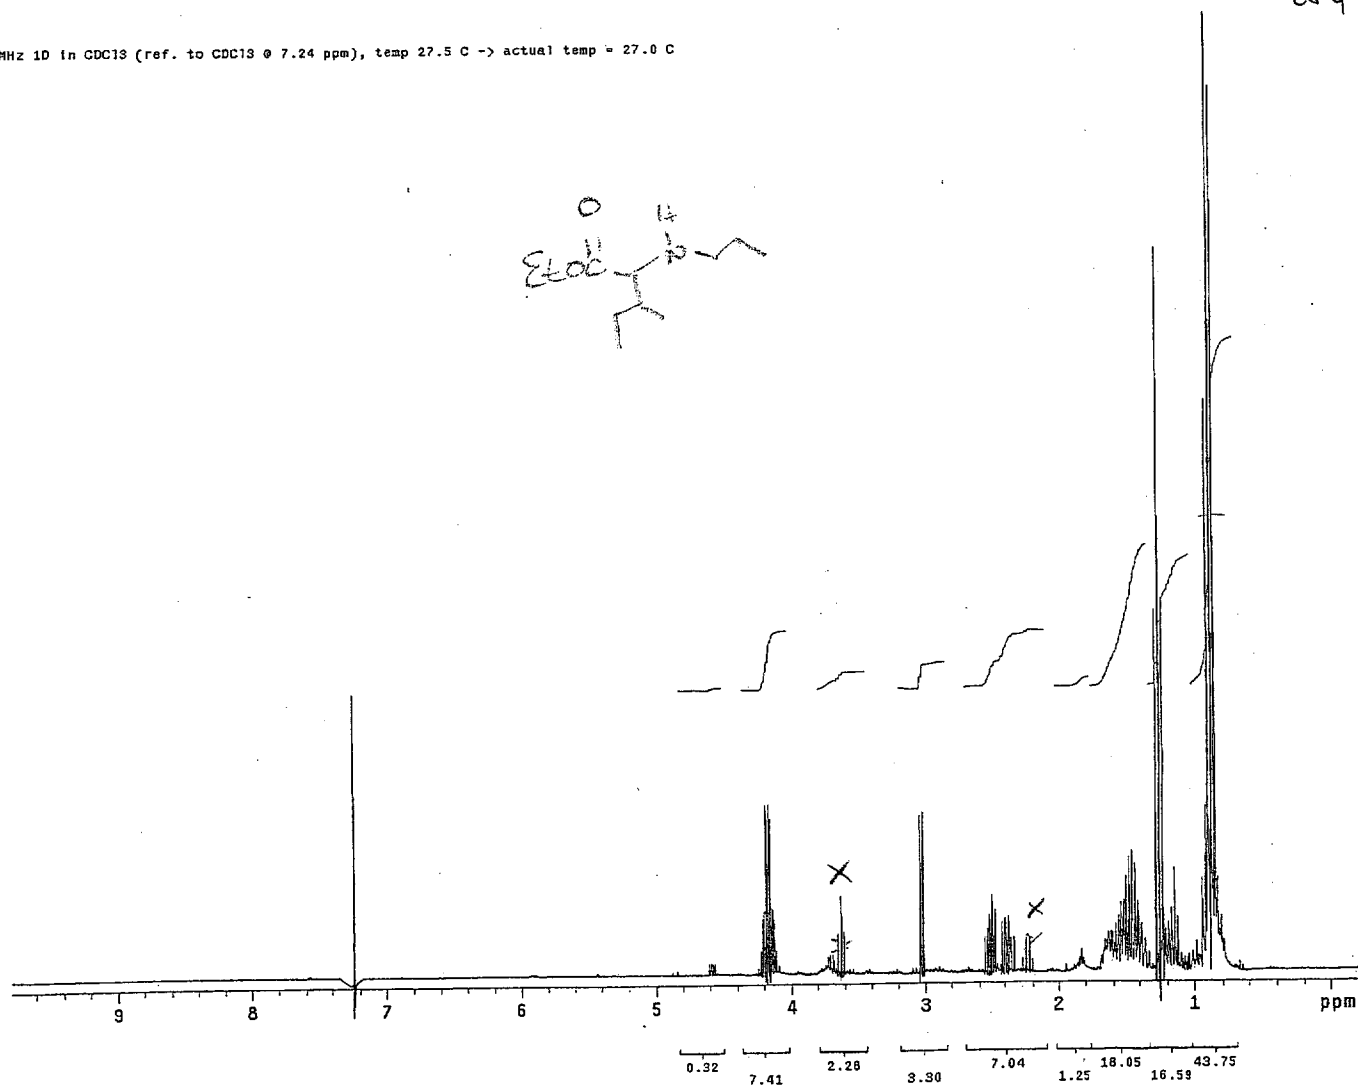

5) Experimental details and relevant MS and NMR spectra ( $^1\text{H}$ ,  $^{13}\text{C}$ ) for the synthesis of tetraamine **8** and its triacetylated derivative **9** (Scheme 2). RP-HPLC trace of Fmoc-derivatized **9**.

**Synthesis of model tripeptide 6.** It was synthesized from aminopropyl-trityl resin using standard Fmoc amino acid coupling chemistry. The *N*-terminal alanine was capped with an acetyl group using the procedure described above for **1f**. The cleaved peptide (5% TFA/ $\text{CH}_2\text{Cl}_2$ ) was found of >95% purity according to  $^1\text{H}$  NMR analysis.

**Synthesis of chiral tetraamine tetrakis(trifluoroacetate) salt (8).** A portion of tripeptide trityl resin **7** (0.351 g, 0.259 mmol, 0.74 mmol/g substitution) was weighed in a 50 mL silanized round bottom flask. The diborane solution (1M/THF, 5.2 mL, 5.2 mmol) was added dropwise under nitrogen atmosphere at rt over 5 min., after which the flask was equipped with a condenser and the suspension refluxed gently (65 °C) for 24h. Upon cooling to rt, the suspended resin was rapidly transferred by pipet (silanized) to a PP vessel by using dry THF to rinse out the flask and wash the resin. Then, dry THF (3 mL), anhydrous diisopropylethylamine (0.7 mL) and glacial acetic acid (1.4 mL) were added successively. To the homogenized suspension was added iodine (1.32 g, 5.2 mmol, as a conc. THF solution) and the vessel was shaken for 4h. The vessel was then rinsed (THF) and the resin was washed (3× each) with THF, DMF/ $\text{Et}_3\text{N}$  3:1, MeOH,  $\text{CH}_2\text{Cl}_2$ , and dried under high vacuum for >12h to give free tetraamino-resin **7** (0.344 g). A resin sample gave a highly positive result on a bromophenol blue test.

A portion of freshly prepared resin **7** (0.174 g, 0.77 mmol/g) was then transferred to a round bottom flask and stirred in a 5% TFA/ $\text{CH}_2\text{Cl}_2$  cleavage cocktail (10 mL) for 2h. The contents were filtered through a glasswool plug, the resin was rinsed with 5% TFA/ $\text{CH}_2\text{Cl}_2$ , and the filtrate was evaporated and dried over high vacuum for >12h to give crude tetraamine tetrakis(trifluoroacetate) salt **8** as a yellow oil (95 mg, 95%). Its purity was estimated to >95% as determined by  $^1\text{H}$  and  $^{13}\text{C}$  NMR (see following pages).

**Synthesis of tetraamine triacetate trifluoroacetate salt (9).** This compound was synthesized from resin **7** (0.119 g, 0.092 mmol) using a procedure similar to compound **1f**. Upon resin cleavage as above, crude compound **9** was obtained as a yellowish oil (41 mg, 96%). Its purity was estimated to >95% according to RP-HPLC analysis (see following pages) with pre-column derivatization as a Fmoc carbamate (see note 20).

<sup>1</sup>H NMR (CD<sub>3</sub>OD)

8 (crude)

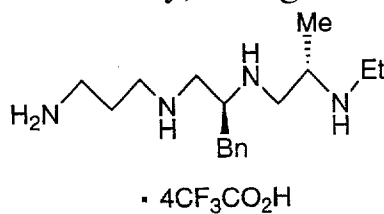

SMH(7)41

300 MHz 1D in CD300 (ref. to CD300 @ 3.30 ppm), temp 27.5 C -&gt; actual temp =27.0 C

Solvent: cd3od  
 Temp. 27.5 C / 300.6 K  
 INOVA-300 "i300"  
 PULSE SEQUENCE  
 Relax. delay 3.000 sec  
 Pulse 77.1 degrees  
 Acq. time 1.954 sec  
 Width 3001.2 Hz  
 16 repetitions  
 OBSERVE H1, 299.9597711 MHz  
 DECOUPLE H1, 299.9612155 MHz  
 Power 3 dB  
 off during acquisition  
 on during delay  
 single frequency  
 DATA PROCESSING  
 FT size 65536  
 Total time 1 minutes

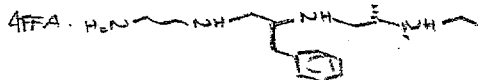CH<sub>3</sub>OH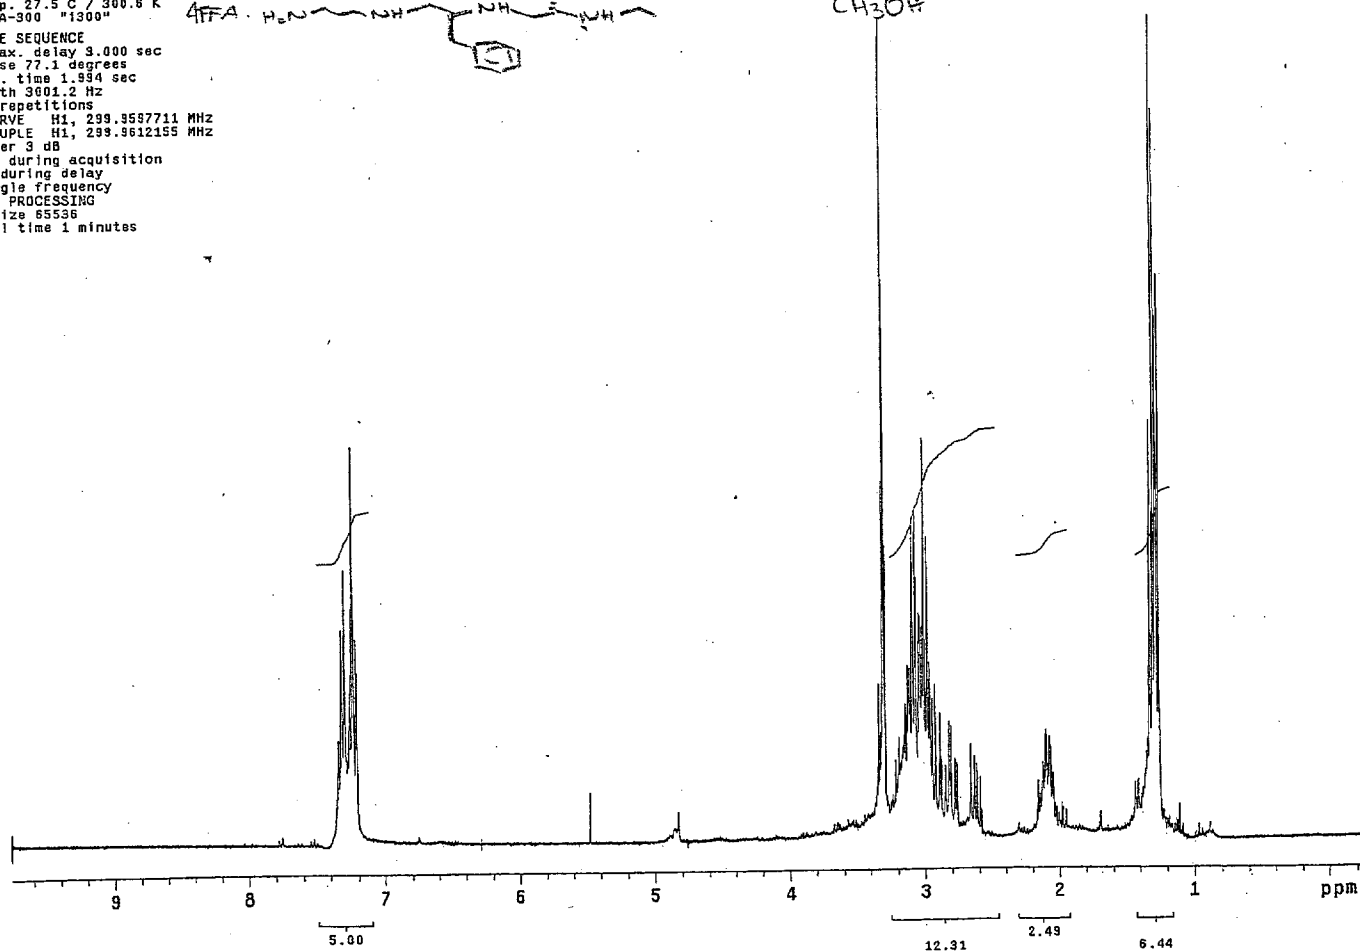

Enlargement

 $^1\text{H}$  NMR ( $\text{CD}_3\text{OD}$ )

8 (crude)

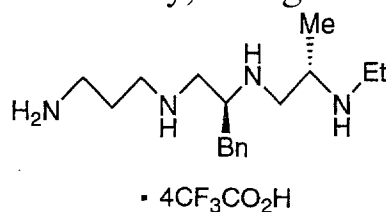300 MHz 1D in  $\text{CD}_3\text{OD}$  (ref. to  $\text{CD}_3\text{OD}$  @ 3.30 ppm), temp 27.5 C -> actual temp =27.0 C

Solvent:  $\text{cd}_3\text{od}$   
 Temp: 27.5 C / 300.6 K  
 INOVA-300 "1300"  
 PULSE SEQUENCE  
 Relax. delay 9.000 sec  
 Pulse 77.1 degrees  
 Acq. time 1.394 sec  
 Width 3081.2 Hz  
 16 repetitions  
 OBSERVE H1, 299.8597711 MHz  
 DECOUPLE H1, 299.8612155 MHz  
 Power 9 dB  
 off during acquisition  
 on during delay  
 single frequency  
 DATA PROCESSING  
 FT size 65536  
 Total time 1 minutes

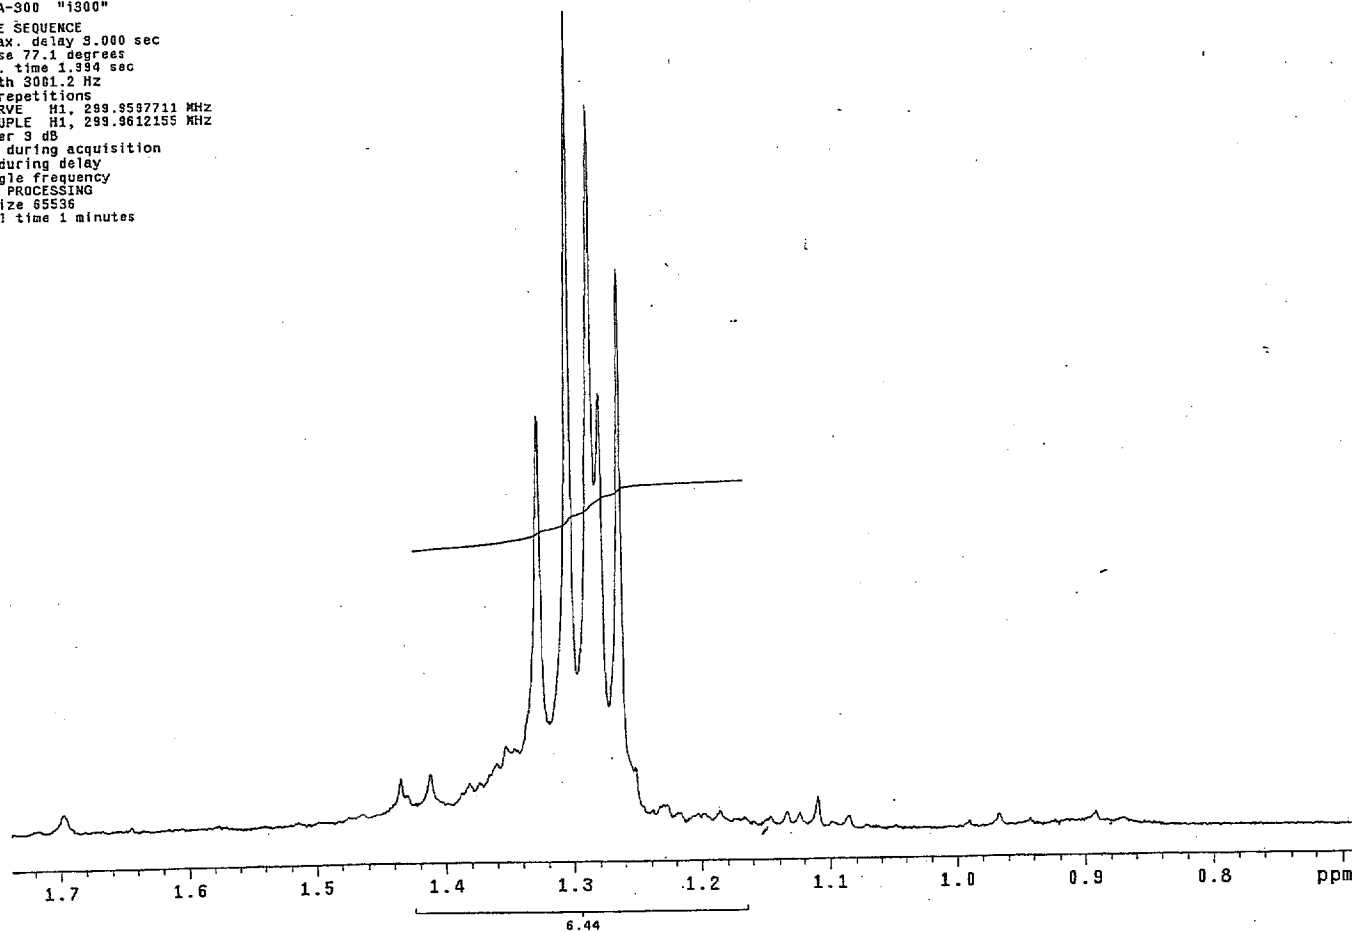

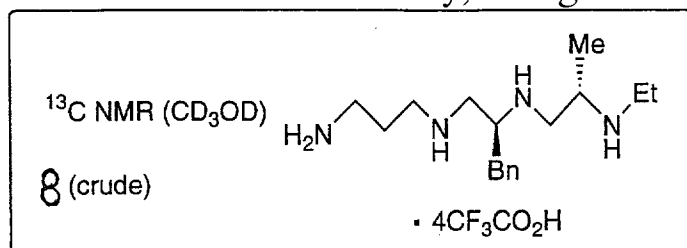S. MANKU  $^{13}\text{C}$  [4H] APT ON SMH (II) -51 IN CD300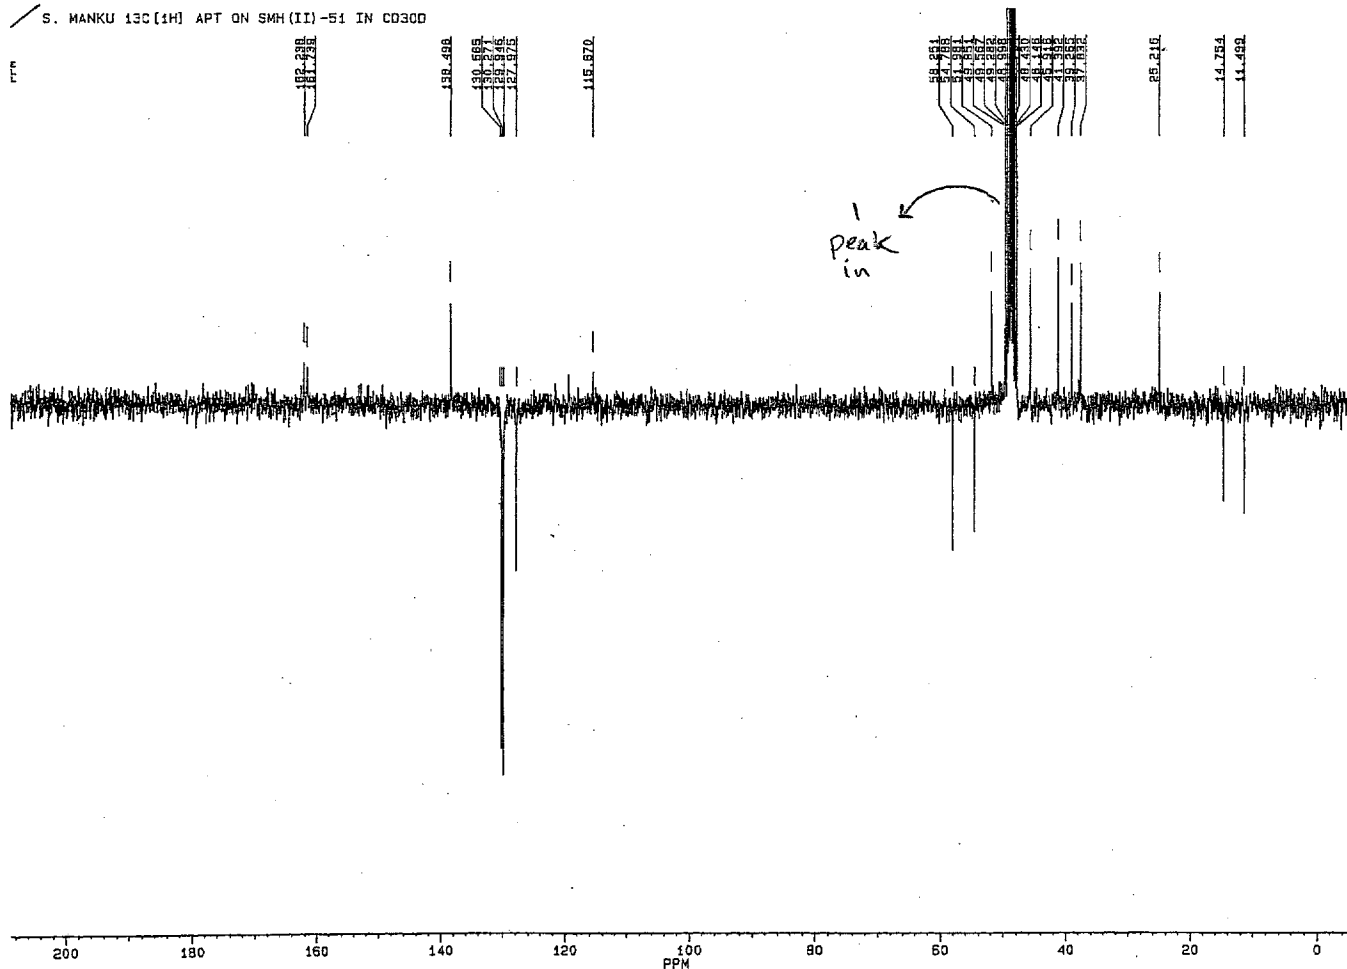

BRUKER

NV120F.101  
AU PROG:  
X25.AU  
DATE 12-11-99  
TIME 21:01

SF 75.469  
SY 112.0  
Q1 7478.000  
S1 32768  
TD 32768  
SH 18518.519  
HZ/PT 1.130

PW 0.0  
RD 0.0  
AQ .885  
RG 800  
NS 6000  
TE 297

FW 23200  
Q2 3595.000  
DP 18H CPD

LB 2.000  
GB 0.0  
CX 36.00  
CY 0.0  
F1 210.016P  
F2 -5.980P  
HZ/CX 452.803  
PPM/CX 6.000  
SR -1214.68

D1 1.5000000  
S1 18H  
P9 100.00  
D2 .0010000  
S2 18H  
P0 1.70  
Q3 .0065000  
P6 8.40  
D4 .0010000  
RCA  
RD 0.0  
PW 0.0  
DE 36.30  
NS 6000  
DS 2

Print of window 80: MS Spectrum

S. Manku

MeOH

100uL/min;nebulizer 10psi;gain 3

Injection Date : 11/3/98 11:41:22 AM

Sample Name : SMH(LI)41

Acq. Operator : Alan

Vial : 1

Inj : 1

Inj Volume : 1 µl

Method : C:\HPCHEM\1\METHODS\MEOHPOS.M

Last changed : 11/3/98 11:38:45 AM by Alan

(modified after loading)

MeOH / H2O

(+) - ES-MS

8 (crude)

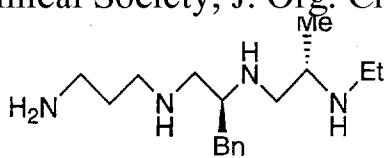• 4CF<sub>3</sub>CO<sub>2</sub>H

MS Spectrum

\*MSD1 SPC, time=0.199:0.546 of NOV98110308.D API-ES Positive

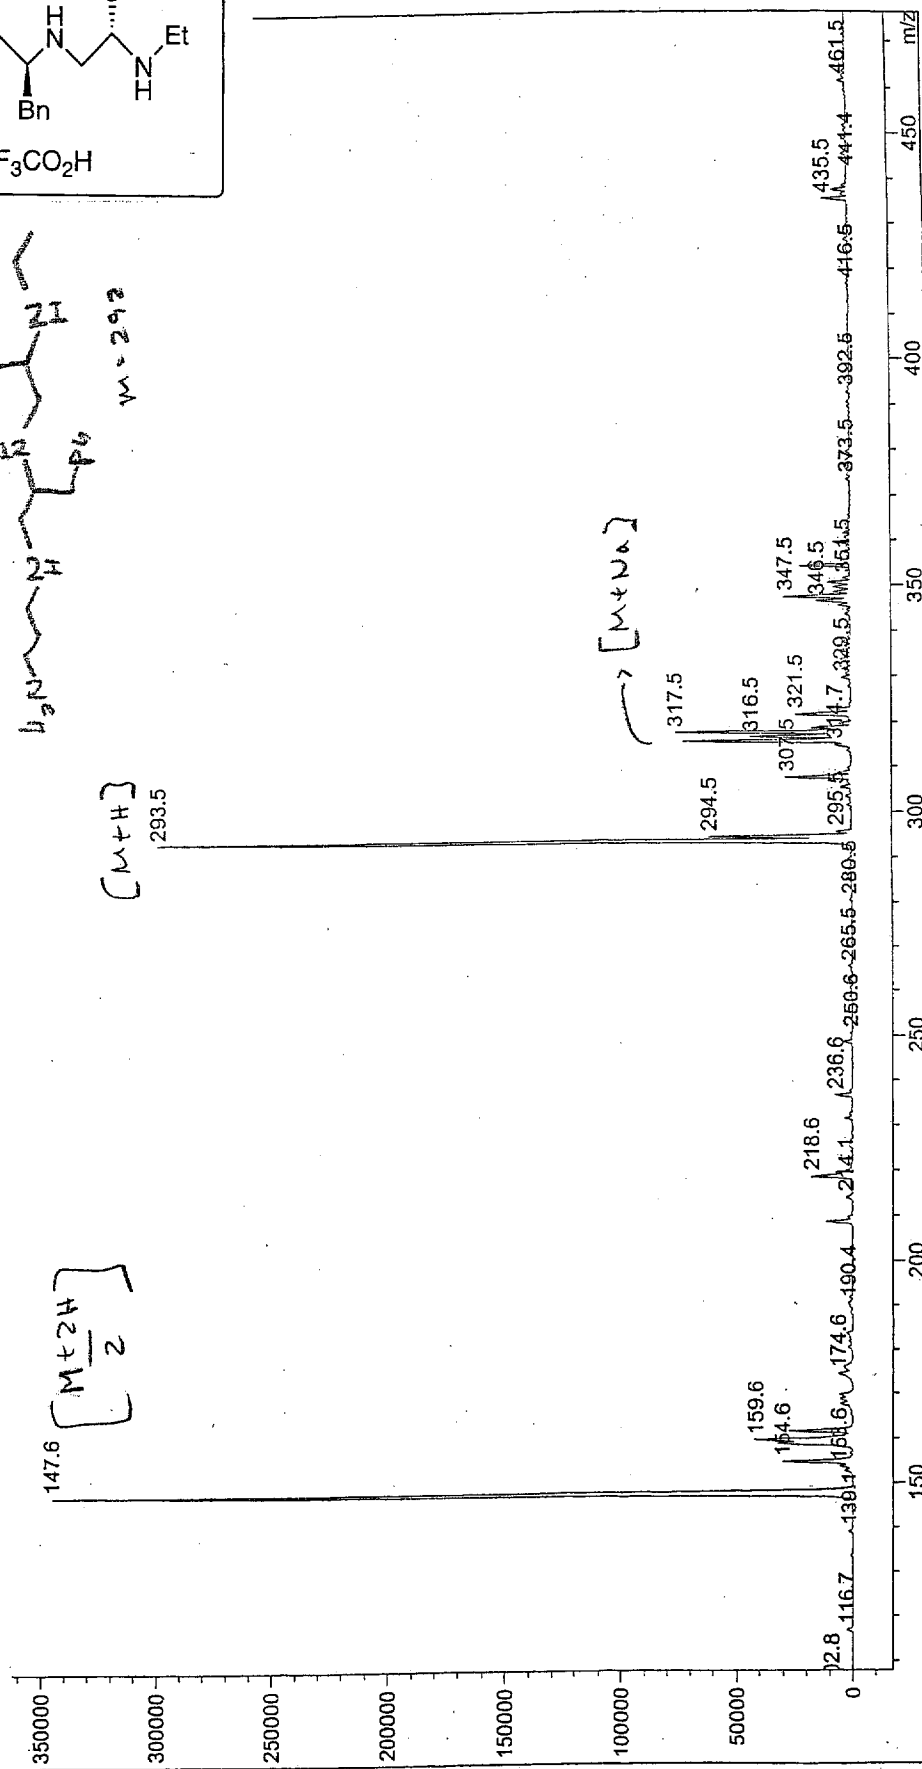

24

Print of window 80: MS Spectrum

i. Manku

MeOH / H<sub>2</sub>O

.00uL/min ; nebulizer 15psi; Gain 1; ramped fragmentor

```
=====
Injection Date : 11/9/98 1:47:28 PM      Seq. Line : 1
Sample Name    : SMH(II)47              Vial : 81
Acq. Operator  : Don                    Inj : 1
                                           Inj Volume : 1 µl
=====
```

Method : C:\HPCHEM\1\METHODS\MEOHPOS.M

Last changed : 11/9/98 1:35:28 PM by Don

MeOH / H<sub>2</sub>O

.00uL/min; gain 1; ramped fragmentor; condensed

MS Spectrum

MSD1 SPC, time=0.337:0.463 of NOV98\98110901.D API-ES Positive

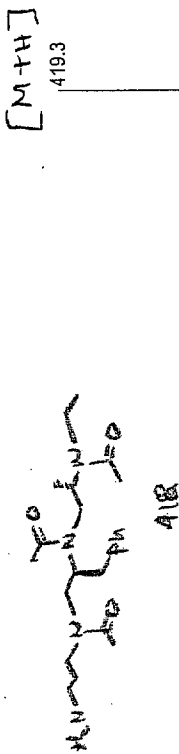[M+H]<sup>+</sup>

419.3

[M+Na]<sup>+</sup>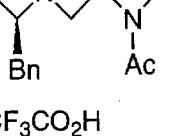

(+) - ES-MS

9 (crude)

· CF<sub>3</sub>CO<sub>2</sub>H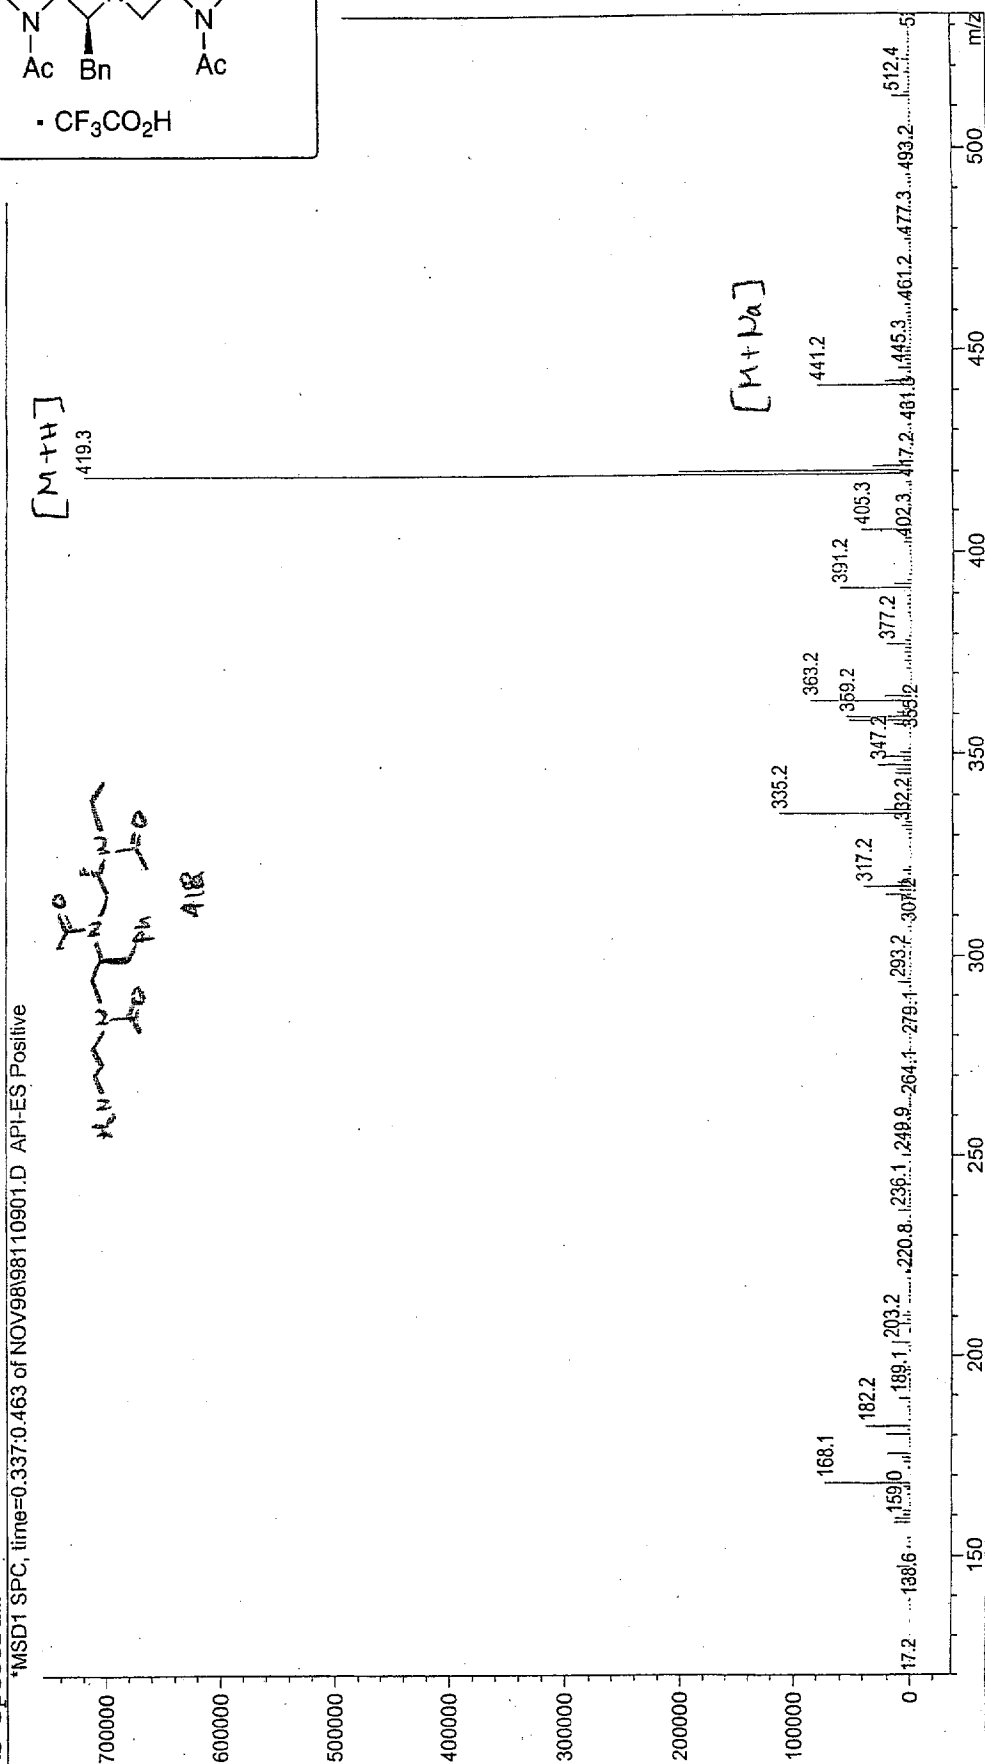

25



=====  
 Injection Date : 11/11/98 5:46:52 PM Vial : 1  
 Sample Name : SMH-II-47  
 Acq. Operator : Dennis Inj Volume : 10 µl  
 Acq. Method : C:\HPCHEM\1\METHODS\DENNIS\DENNIS3.M  
 Last changed : 11/11/98 5:45:43 PM by Dennis  
 (modified after loading)  
 Analysis Method : C:\HPCHEM\1\METHODS\DENNIS\DENNIS3.M  
 Last changed : 11/10/98 9:15:19 PM by Dennis  
 Basic method to analyze Fmoc-aminoacids and oligoamines with or without pre-column  
 derivatization. Made for completing JOC manuscript on November 8 1998. Employs 0.1% aq, TFA,  
 ACN.

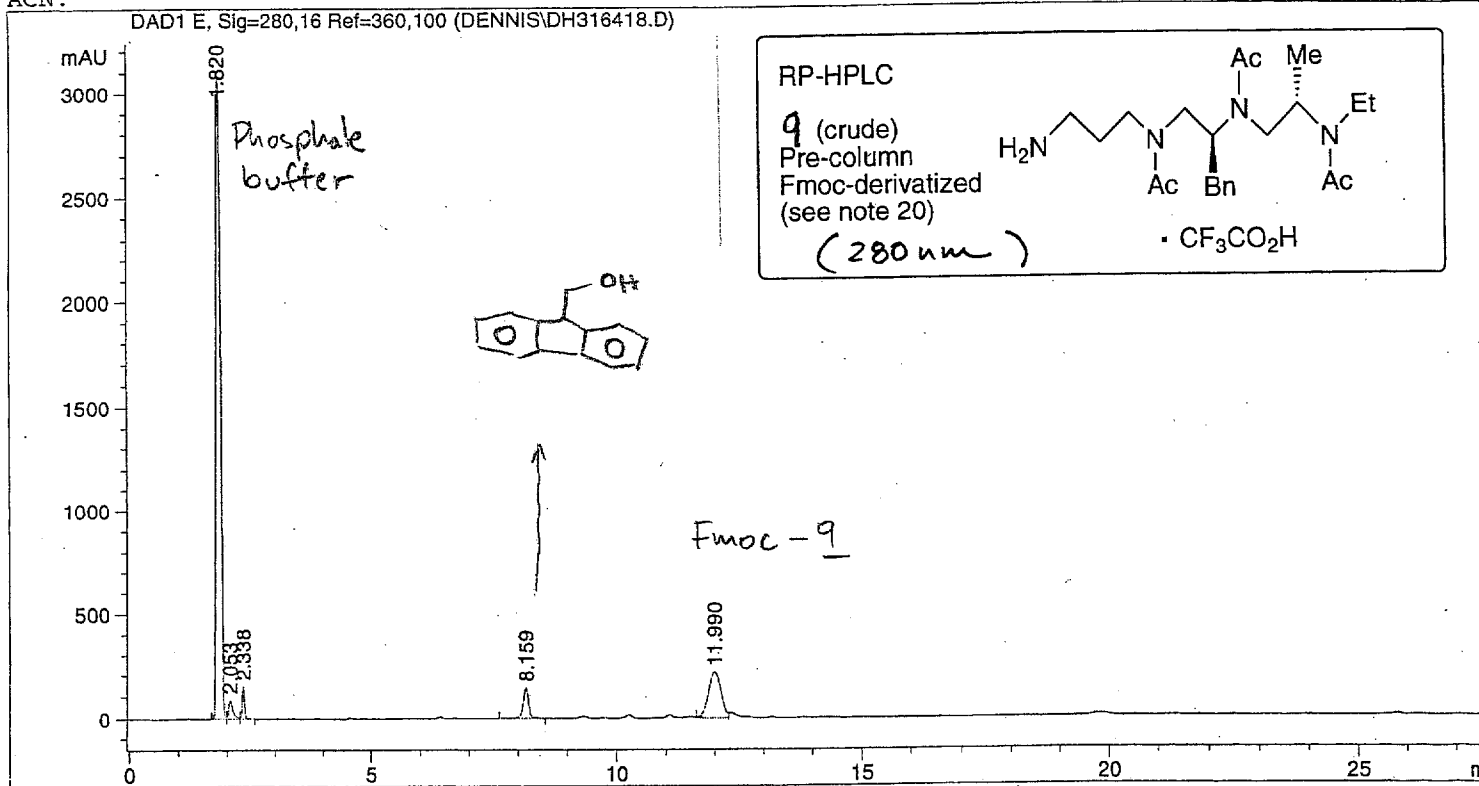

=====  
 Area Percent Report  
 =====

Sorted By : Signal  
 Multiplier : 1.0000  
 Dilution : 1.0000

Signal 1: DAD1 E, Sig=280,16 Ref=360,100

| Peak # | RetTime [min] | Type | Width [min] | Area [mAU*s] | Height [mAU] | Area %  |
|--------|---------------|------|-------------|--------------|--------------|---------|
| 1      | 1.820         | BV   | 0.1092      | 1.98705e4    | 3083.13501   | 76.3780 |
| 2      | 2.053         | VV   | 0.0935      | 551.69836    | 85.28393     | 2.1206  |
| 3      | 2.338         | VB   | 0.0573      | 560.41656    | 150.98053    | 2.1541  |
| 4      | 8.159         | BB   | 0.1233      | 1148.89429   | 140.61037    | 4.4161  |
| 5      | 11.990        | VV   | 0.2784      | 3884.49683   | 217.45985    | 14.9312 |

Totals : 2.60160e4 3677.46969

Results obtained with enhanced integrator!  
 =====

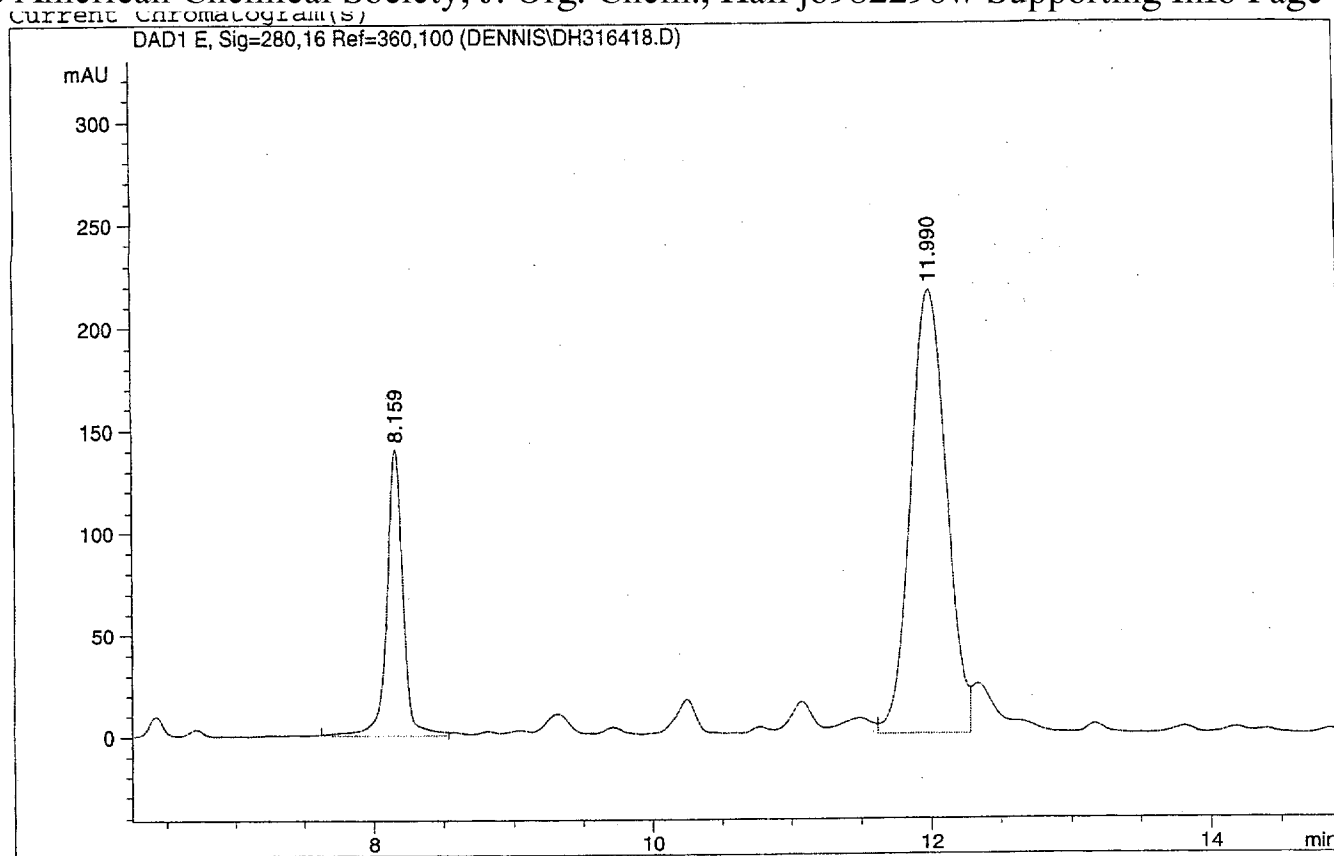

RP-HPLC

9 (crude)

Pre-column

Fmoc-derivatized  
(see note 20)

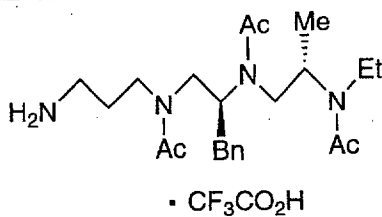

Enlargement
